# Supplementary material for: Implementation of global soil databases in NOAH-MP model and the effects on simulated mean and extreme soil hydrothermal changes
Source: Copernicus journal article supplement (doi:10.5194/hess-2023-304), 2024-04-30
Supplement: Supplementary file [file hess-2023-304-RC2-supplement.pdf]

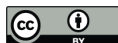

1 **Implementation of global soil databases in NOAH-MP model and the effects on**  
2 **simulated mean and extreme soil hydrothermal changes**

3 Kazeem A. Ishola<sup>1,3</sup> Gerald Mills<sup>2</sup>, Ankur P. Sati<sup>2</sup>, Benjamin Obe<sup>2</sup>, Matthias Demuzere<sup>5</sup>,  
4 Deepak Upreti<sup>1,3</sup>, Gourav Misra<sup>3</sup>, Paul Lewis<sup>3</sup>, Daire Walsh<sup>3</sup>, Tim McCarthy<sup>3</sup>, Rowan  
5 Fealy<sup>4,\*</sup>

6 <sup>1</sup>Irish Climate Analysis and Research UnitS (ICARUS), Maynooth University, Maynooth, Ireland

7 <sup>2</sup>School of Geography, University College Dublin, Dublin, Ireland

8 <sup>3</sup>National Centre for Geocomputation, Maynooth University, Maynooth, Ireland

9 <sup>4</sup>Department of Geography, Maynooth University, Maynooth, Ireland.

10 <sup>5</sup>B-Kode VOF, Ghent, Belgium

11 *Correspondence to:* Kazeem Ishola ([Kazeem.Ishola@mu.ie](mailto:Kazeem.Ishola@mu.ie)) and Rowan Fealy ([Rowan.Fealy@mu.ie](mailto:Rowan.Fealy@mu.ie))

12

13 **Abstract**

14 Soil properties and their associated hydro-physical parameters represent a significant  
15 source of uncertainty in Land Surface Models (LSMs) with consequent effects on  
16 simulated sub-surface thermal and moisture characteristics, surface energy  
17 exchanges and turbulent fluxes. These effects can result in large model differences  
18 particularly during extreme events. Typical of many model based approaches, spatial  
19 soil information such as location, extent and depth of textural classes are derived from  
20 coarse scale soil information and employed largely due to their ready availability rather  
21 than suitability. However, the use of a particular spatial soil dataset has important  
22 consequences for many of the processes simulated within a LSM. This study  
23 investigates NOAH-MP model uncertainty in simulating soil moisture (expressed as a  
24 ratio of water to soil volume,  $\text{m}^3 \text{m}^{-3}$ ) and soil temperature changes associated with two  
25 widely used global soil databases (STATSGO and SOILGRIDS) across the Island of  
26 Ireland. Both soil datasets produced a significant dry bias in loam soils, up to  $0.15 \text{ m}^3$   
27  $\text{m}^{-3}$  in a wet period and  $0.10 \text{ m}^3 \text{m}^{-3}$  in a dry period. The spatial disparities between  
28 STATSGO and SOILGRIDS also influenced the regional soil hydrothermal changes  
29 and extremes. SOILGRIDS was found to intensify drought characteristics - shifting  
30 low/moderate drought areas into extreme/exceptional during dry periods - relative to  
31 STATSGO. Our results demonstrate that the coarse STATSGO performs as good as  
32 the fine-scale SOILGRIDS soil database. However, the results underscore the need to  
33 develop detailed regionally-derived soil texture characteristics, and for better  
34 representations of soil physics in LSMs to improve operational modeling and  
35 forecasting of hydrological processes and extremes.

36

37 **Keywords:** soil moisture; soil temperature, droughts; Land surface model; soil  
38 hydrophysical properties



1

## 2 1. Introduction

3 The pedosphere (or soil) is an important component of the Earth system and plays a  
4 critical role in energy, water and biogeochemical exchanges that occur at the land-  
5 atmosphere interface (Dai et al., 2019a,b). The accurate description and  
6 representation of soil textural categories and/or soil hydro-physical properties is  
7 fundamental to developing and enhancing Earth system modeling (ESM) capacity in  
8 predicting land surface exchanges at different scales (Luo et al., 2016; Dai et al.,  
9 2019a,b). This information is incorporated via the respective land surface model (LSM)  
10 – the only physical boundary in an ESM and is a key component of any ESM framework  
11 (Fisher and Koven, 2020; Blyth et al., 2021). However, accurate descriptions of soil  
12 properties in LSMs are difficult to obtain due to the limited availability of high resolution  
13 global-scale soil texture measurements or lack of regionally specific measured soil  
14 properties (e.g. Kishné et al. 2017; Dennis and Berbery, 2021; 2022). This represents  
15 a key limitation and is a source of model uncertainty in current LSMs (Li et al., 2018),  
16 and consequently weather and climate models.

17 In many LSMs, soil hydrothermal properties such as saturated soil hydraulic  
18 conductivity and diffusivity, porosity, field capacity, wilting point, saturated soil matric  
19 potential, etc. are linked to soil textural classes/compositions in two ways. Typically,  
20 models employ a model-prescribed look-up table, with values that are empirically  
21 derived from existing/available in-situ soil surveys, to associate mean soil properties  
22 with each soil type. The soil categories are identified by grouping soil samples with  
23 similar properties using particle size analysis (e.g. Gee and Bauder, 2018). While this  
24 option is computational efficient, it assumes that the derived values are globally  
25 transferable which may not be realistic as soil properties vary both horizontally and  
26 vertically. This approach is also dependent on having access to soil texture maps; the  
27 scale and extent of which varies between different soil databases (Dai et al., 2019a,b;  
28 Dennis and Berbery, 2022). In spite of this, the use of readily available global soil  
29 texture maps in combination with model look-up tables is a standard practice in ESM  
30 research. As an alternative approach, new state-of-the-art global soil information  
31 datasets are being explored to constrain and improve the representation of soil  
32 processes within LSMs (e.g. de Lannoy et al., 2014; Shangguan et al., 2014; Hengl et  
33 al., 2017; Looy et al., 2017; Dennis and Berbery, 2021;2022; Xu et al., 2023). For some  
34 LSMs, soil hydrothermal properties can be estimated from a set of equations known  
35 as PedoTransfer Functions (PTFs) that require information on soil composition such  
36 as sand, silt and clay composition and organic matter (Looy et al., 2017; Dai et al.,  
37 2019a,b).



1 The existing PTFs are based on different approaches (Looy et al., 2017) including,  
2 physically-based relationships or advanced statistical approaches based on machine  
3 learning, random forest and neural networks (Lehmann et al., 2018; Zhang et al., 2018;  
4 Or and Lehmann, 2019; Szabó et al. 2019). Clearly, the existing PTFs vary in  
5 complexity. Thus, the choice of PTFs partly depends on the availability of inputs  
6 (Weihermüller et al. 2021) and has been reported to impact soil moisture simulations,  
7 with consequent effects on the surface energy and water fluxes, land-atmosphere  
8 coupling, atmospheric moisture budget, boundary layer evolution and regional climate  
9 (Dennis and Berbery, 2021; 2022; Weihermüller et al. 2021; Xu et al., 2023; Zhang et  
10 al., 2023). Moreover, as soil moisture affects land-atmosphere interactions largely  
11 through its control on the evaporative fraction (e.g. Seneviratne et al., 2010; Ishola et  
12 al., 2022), soil hydrophysical properties play an important role in simulating climate  
13 extremes (e.g. droughts) (He et al., 2023; Zhang et al., 2023). Weihermüller et al.  
14 (2021), using the HYDRUS-1D model, reported that soil hydraulic properties estimated  
15 from different PTFs resulted in substantial variability in the predicted water fluxes. In  
16 this context, Dennis and Berbery (2021) and Dennis and Berbery (2022) employed soil  
17 properties derived from two different sources, the STATSGO and the Global Soil  
18 Dataset for Earth System Modelling (GSDE), in the Weather and Research  
19 Forecasting (WRF) and Community Land Model (CLM) models, and found soil texture-  
20 related differences in the surface fluxes that can lead to differences in the evolution of  
21 boundary layer thermodynamic structure and precipitation development. This finding  
22 is further supported by Zhang et al. (2023). Recently, Xu et al. (2023) demonstrated  
23 that using state-of-the-art soil information, such as POLARIS and the 250 m SoilGrids,  
24 can improve the performance of LSMs.

25 Here we focus on the response of the NOAH-MP LSM to soil information with the  
26 objectives evaluating the model representation of land surface fields; however, a LSM  
27 will also respond to changes in other drivers, such as vegetation (e.g. albedo, surface  
28 roughness length, etc.) and meteorological forcing (Arsenault et al., 2018; Hosseini et  
29 al., 2022). The first effort to implement SoilGrids in NOAH-MP LSM was recently  
30 evaluated over Southern Africa (Zhang et al., 2023). Our study complements the  
31 previous effort by evaluating the impact of combining the SoilGrids soil compositions  
32 with PTFs. Specifically, we focus on the impact of two different soil datasets on  
33 simulations of soil moisture and temperature during a period of normal and dry weather  
34 conditions.

35

## 36 **2. Data and Methods**

### 37 **2.1 Background context of Ireland**



1 The Ireland is situated in a maritime temperate region where the climate is  
2 predominantly influenced by the mid-latitude westerly warm airflow off the North  
3 Atlantic Ocean, and occasional incursions of cold air masses during winter (Peel et al.,  
4 2007). The long-term (1981-2010) average daily maximum temperature of the region  
5 is between 18° and 20°C in summer and 8 °C in winter. Occasionally, the daily  
6 minimum temperature drops below 0 °C in winter. Rainfall is distributed throughout the  
7 year with mean annual value of 1200 mm. The west of Ireland typically experiences  
8 higher rainfall amounts (1000-1400 mm), and may exceed 2000 mm in the upland  
9 areas. Conversely, the east experiences lower rainfall amounts, between 750 and  
10 1000 mm. More details on the background climate of Ireland are provided in Walsh  
11 (2012). In relation to the general soil information (Figure 1a), the south-east is  
12 characterized mainly by free draining sandy soils, peat soils dominate the mountains,  
13 hills and western edge of the country, while limestone-rich soils dominate the midlands  
14 and south (Creamer et al., 2014). Among the land cover types (Figure 1b), grassland  
15 dominates the agricultural and total land area in Ireland. The temperate climate in  
16 combination with fertile soils, mostly in the south and east where the soils are free  
17 draining, provides conditions that are favourable to near year round grass growth.  
18 However, the heavy clay (wet) soils limit grass growth in the west and north of the  
19 country (Keane and Collins, 2004).

20

## 21 2.2 Model description

22 Here, we employ the advanced community NOAH-MP land surface model with multi-  
23 parameterization options, with improved representation of physical processes (Chen  
24 et al., 1996; Niu et al., 2011). The model is available as an uncoupled model, with the  
25 capacity to simulate different land state variables (e.g. soil moisture) and land energy,  
26 water and carbon fluxes. It also represents a LSM that is coupled with atmospheric  
27 models such as the Weather Research and Forecasting (WRF) model (Barlage et al.,  
28 2015). Due to its simplicity in selecting and combining multi-physics options, the model  
29 has been widely used for different applications, including natural hazards, drought and  
30 wildfire monitoring, land-atmosphere interactions, sensitivity and uncertainty  
31 quantification, biogeochemical processes, water dynamics, dynamic crop growth  
32 modeling, and soil hydrothermal processes. (Zhuo et al., 2019; Kumar et al., 2020;  
33 Chang et al., 2022; Hosseini et al., 2022; Nie et al., 2022; Warrach-Sagi et al., 2022;  
34 Hu et al., 2023).

35

36 In NOAH-MP LSM, the major improvements in mechanisms relevant to soil processes  
37 are (1) distinguishing less and more permeable frozen soil fractions, (2) introducing an



1 alternative lower boundary soil temperature that is based on zero heat flux from the  
2 deep soil bottom, (3) adding TOPMODEL and SIMGM models for runoff and  
3 groundwater physics options (Niu et al., 2007), and (4) adding an unconfined aquifer  
4 beneath the 2 m bottom of the soil layer to account for water transport between the soil  
5 and aquifer. Relative to other LSMs, the NOAH-MP model framework is typical in its  
6 ability to define soil properties either by using dominant soil texture linked to  
7 empirically-derived soil parameter values, using soil texture with varying depths, or  
8 using soil texture compositions derived using PTFs (Saxton and Rawls, 2006).  
9 The prognostic equations from Mahrt and Pan (1984) are used to describe soil  
10 moisture and soil temperature in the model (Chen et al., 1996).

$$11 \quad C(\theta) \frac{\partial T}{\partial t} = \frac{\partial}{\partial z} \left( K_t(\theta) \frac{\partial T}{\partial z} \right) \quad (1),$$

$$12 \quad \frac{\partial \theta}{\partial t} = \frac{\partial}{\partial z} \left( D \frac{\partial \theta}{\partial z} \right) + \frac{\partial K}{\partial z} + F_\theta \quad (2),$$

13 where  $C$  is the volumetric heat capacity,  $\theta$  is the soil moisture,  $T$  is the soil temperature,  
14 and  $K$  and  $K_t$  are the hydraulic and thermal conductivities, respectively.  $D$  is the soil  
15 diffusivity and  $F_\theta$  are the sinks and sources of soil water, that is, evaporation and  
16 precipitation.

17

### 18 2.3 Gridded data

19 Meteorological variables which are required as initial and forcing conditions are  
20 obtained from the European Centre for Medium-Range Weather Forecasting (ECMWF)  
21 database. We employ the state-of-the-art ECMWF ERA5-Land global reanalysis  
22 product that provides data at  $0.1^\circ$  ( $\sim 9$  km) spatial and hourly temporal resolution  
23 (Muñoz-Sabater, 2021). The required forcing variables include total precipitation,  
24 incident shortwave and longwave radiation, 2m air temperature, 10m zonal and  
25 meridional wind components, surface pressure and specific humidity. For initialisation,  
26 the model also requires input fields of soil temperature, surface skin temperature,  
27 canopy water and snow water equivalent at the first timestep. The hourly data for all  
28 variables was obtained for the period 2009-2022.

29 NOAH-MP model also requires static geographical data (e.g. soil texture and land use)  
30 and time varying vegetation products (e.g., leaf area index and fraction of green  
31 vegetation). We use the STATSGO gridded soil categories map provided at 5 arcmin  
32 resolution ( $\sim 9$  km) (FAO 2003a;b) and the International Soil Reference and Information  
33 Centre (ISRIC) global SoilGrids data (Hengl et al., 2017; Poggio et al., 2021). The latter  
34 is available at 250 m resolution and six standard soil depths, however, sand and clay  
35 proportions are currently available at four layers and provided as part of the WRF

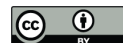

1 geographical data fields. Preprocessing of the data was undertaken in the WRF  
2 Preprocessing System (WPS) (Skamarock et al., 2019).

3

#### 4 2.4 Model simulations

5 We set up and ran an offline NOAH-MP model version 4.3 within the framework of the  
6 High Resolution Land Data Assimilation System (HRLDAS) (Chen et al., 2007). Using  
7 the WPS system, the model domain is set up as a 1 km grid space covering the island  
8 of Ireland and the west coast of the United Kingdom (Figure 1). We incorporate a high  
9 resolution land use dataset based on the 100 m raster CORINE Land Cover for 2018  
10 (CLC 2018). The 44 CORINE land cover classes are initially reclassified into 21  
11 categories to match the default modified IGBP MODIS 20-category land use (Figure 1  
12 b). The data is then resampled to 250 m. To generate the required geographic files for  
13 input to NOAH-MP, the CLC 2018 is converted to binary format which is used as input  
14 to the WPS, which subsequently generates the gridded geographic information  
15 required to run the NOAH-MP model. Other geographical data, such as topography,  
16 green vegetation fraction and surface albedo used in this study are derived from the  
17 model default datasets provided by the Research Application Laboratory, National  
18 Center for Atmospheric Research (RAL/NCAR).

19 To investigate the effect of soil hydrophysical properties on model simulations of soil  
20 moisture and soil temperature, we configure two experiments that are based on  
21 different soil data options, namely, (1) dominant soil texture categories used as default  
22 in WRF/NOAH-MP; and, (2) soil textural compositions in combination with PTFs  
23 (Saxton and Rawls, 2006). The dominant soil texture option uses the baseline  
24 FAO/STATSGO dataset with the empirically-derived soil properties from a look-up  
25 table, while the PTFs-derived soil properties use the fine-scale SoilGrids sand and clay  
26 proportions. The dominant topsoils across the domain are broadly classified into four  
27 and two broad categories based on STATSGO and SoilGrids, respectively (Figure 2).  
28 While Loam and Sandy Loam soil textures cover the largest area in both data sources  
29 (Table 2), the extent to which the difference in the data and soil physics options  
30 contribute to model uncertainty in NOAH-MP model is evaluated. Other NOAH-MP  
31 physics options used are outlined in Table 3.

32 For the numerical experiments, the soil layer thicknesses of 0.07, 0.21, 0.72 and 1.55  
33 m are used, with a cumulative soil depth of 2.55 m. The thicknesses are selected to  
34 match the layers of initial soil input fields from ERA5-Land. The model is spun-up over  
35 10 years for each experiment using the climatology of the hourly ERA5-Land for the  
36 period 2009-2022, to bring the soils to thermal and hydrologic equilibrium with the  
37 atmosphere. After spin-up, the model is assumed to be stable and is then used as the



1 point to initialise the simulations, reported on here, using the hourly meteorological  
2 forcing from 2009 to 2022.

3

#### 4 2.5 Station data

5 Profile measurements of soil temperature and volumetric water content are obtained  
6 from two established eddy covariance grass flux sites, namely, Johnstown Castle and  
7 Dripsey (Kiely et al., 2018; Murphy et al., 2022), and five new sites (as part of the  
8 Terrain-AI project) at Athenry, Ballyhaise, Claremorris, Dunsany and Valentia. Terrain-  
9 AI is an on-going large-scale project, which in part focuses on establishing a long-term  
10 network of soil moisture monitoring sites across Ireland. It monitors and measures in  
11 situ soil moisture contents using Time Domain Reflectometry (TDR) sensors installed  
12 at different soil depths. Given that the Terrain-AI sites are new, the VWC  
13 measurements are so far limited to a year, and are prone to outliers because the TDR  
14 probes may require some time for the soil to settle and provide reliable measurements.  
15 In addition, the soil temperature measurements obtained from Met Eireann for the  
16 Terrain-AI sites are not homogenised or quality controlled. Despite the limitations of  
17 the observed data from the Terrain-AI sites, they are the only station observations  
18 available to evaluate our model results.

19 All the selected sites are distinguished by soil texture (Table 1) and contrasting soil  
20 water regimes (Figure 1 a). For example, Johnstown Castle site is characterized by  
21 seasonally dry and free draining sandy loam soils, whereas Dripsey is dominated by  
22 heavy soils that retains water throughout the year (e.g. Ishola et al., 2020). Half-hourly  
23 or hourly measurements are obtained for 2009-2012 period from Dripsey, 2018 (only  
24 second half of the year), 2019 and 2021 from Johnstown Castle, and the year 2022 for  
25 the Terrain-AI sites. Metadata for each station, outlining soil type, land cover and  
26 altitude are provided in Table 1.

27

#### 28 2.6 Satellite products

29 Global satellite soil moisture datasets (e.g. ESA-CCI, SMAP, SMOS, and ASCAT) are  
30 often used to evaluate LSM at large spatial scales. Many of these products differ in  
31 terms of the satellite sensors and start of operations, and are subject to data gaps,  
32 coarse resolution and limited coverage (Beck et al., 2021). We use the Soil Water  
33 Index (SWI) products (soil moisture expressed in percentage degree of saturation)  
34 from the fusion of Sentinel-1 C-SAR and Metop ASCAT sensors to evaluate NOAH-  
35 MP model at grid scales. The product is produced from ASCAT surface soil moisture  
36 (SSM) using a two-layer water balance model that relates the surface and profile soil  
37 moisture as a function of time (Wagner, 1999; Albergel et al., 2008). We employ the



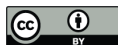

1 operational ASCAT SWI provided at eight different time characteristics (taken as the  
2 soil depths), 1km resolution and daily mean values, from 2015 to 2022. The product is  
3 archived by Copernicus Land Service and has been well validated in previous studies  
4 (e.g. Albergel et al., 2012; Paulik et al., 2014; Beck et al., 2021).

5

## 6 2.7 Analysis

### 7 2.7.1 Model evaluation using in situ data

8 The half-hourly or hourly station data and model outputs for each grid cell are  
9 aggregated to daily averages to be consistent throughout the analysis. Then, for each  
10 validation site and variable, the daily mean values from the respective model grid cell  
11 are extracted at the model resolution. The daily values of soil temperature and  
12 volumetric water content (both at topsoil 0-7cm) layer are compared against the in situ  
13 measurements. The model estimated values are then evaluated using the Root Mean  
14 Square Deviation (RMSD), Percent Bias (PBIAS) and Pearson's Correlation  
15 Coefficient (R).

16

### 17 2.7.2 Model evaluation using satellite data

18 Given the limited number of in situ sites and scale differences between point  
19 observations and model grid resolution, the general interpretation of model  
20 performance across landscapes should be treated with care. However, the use of  
21 satellite data is a standard practice and a pragmatic way of evaluating model outputs  
22 of soil moisture over large spatial scales (He et al., 2023), notwithstanding the inherent  
23 uncertainty (e.g. coarse resolution and data gaps) of the satellite products. We  
24 evaluate NOAH-MP soil moisture output against ASCAT SWI for the surface and  
25 subsurface layers. To make the NOAH-MP soil moisture comparable with ASCAT SWI,  
26 we derive the grid-scale Relative Soil Moisture (RSM) to vary between 0 for wilting  
27 point and 1 for saturation (e.g. Samaniego et al., 2018)

$$28 \quad RSM_{i,j,k} = \left( \frac{\theta_{i,j,k} - \theta_{wilt,i,j}}{\theta_{sat,i,j} - \theta_{wilt,i,j}} \right) \times 100 \quad 3,$$

29 Where  $\theta_{i,j,k}$  is the simulated volumetric water content,  $\theta_{sat}$  and  $\theta_{wilt}$  are the soil  
30 moisture at saturation and wilting point, respectively (Figure 3). We obtain RSM values  
31 for both the surface and subsurface soil layers. For the surface, ASCAT SWI-002 data,  
32 which imply the surface soil moisture conditions, are contrasted against the derived  
33 RSM values for the topmost soil depths of 3.5 cm. The subsurface RSM values are  
34 taken as the mean aggregates of the first three model layers, and are evaluated  
35 against ASCAT SWI-100. Similar metrics used for point-scale evaluation (see Section





1 2.7.1) are also calculated at grid scale between the reference datasets and model  
2 outputs for selected dry (2018) and normal (2019) years.

3

#### 4 2.7.3 Soil moisture drought analysis

5 We also analyse the potential of NOAH-MP for monitoring the evolution of soil moisture  
6 drought across the domain. Since the west-central European summer drought of 2018  
7 was an exceptional event in terms of hydrological extremes across Ireland (Met  
8 Éireann Report, 2018; Falzoi et al., 2019; Moore, 2020; Ishola et al., 2022), we  
9 evaluated the model over this period. We apply grid-scale cumulative RSM values  
10 integrated over three topmost soil layers (0-100 cm) (Section 2.7.2), due to its simplicity  
11 and ease in quantifying and interpreting available soil water. In principle, RSM is an  
12 important drought indicator, particularly at short-time scales, and analogous to the  
13 widely used Soil Moisture Index (SMI) for drought monitoring at different spatial scales  
14 (Samaniego et al., 2018; Grillakis, 2019).

15 To characterise soil moisture drought, percentiles of RSM values per grid cell are  
16 calculated based on 7-day windows from June to August for the climatology period  
17 2009 - 2022. This amounts to 98 samples (7 days x 14 years) as input per window. For  
18 individual model experiments, STATSGO and SOILGRIDS, the derived spatial RSM  
19 percentiles per day in each window are then classified into different drought categories  
20 (Table 5), following Xia et al. (2014). These categories are currently being used by U.S.  
21 Drought Monitor (USDM) for operational and regionally specific drought monitoring  
22 (Svoboda et al., 2002).

23

### 24 3. Results

25 First, we present the analysis of ERA5-Land total annual precipitation in comparison  
26 with station data, to illustrate the level of uncertainty in input meteorology. Figure 4  
27 shows that the seasonal variations and total annual cumulative of precipitation are  
28 reasonably replicated across the selected stations, and for different weather conditions,  
29 including the extended period of no rainfall in 2018 summer (Figure 4 f).

#### 30 3.1 Model evaluation: Soil moisture

##### 31 Using station observations

32 The results of model simulations of volumetric water content (VWC in  $\text{m}^3 \text{m}^{-3}$ ) for both  
33 STATSGO and SOILGRIDS are presented. Figures 5 and A1 illustrate the temporal  
34 comparisons and error statistics of VWC, respectively. **It is important to note that we**  
35 **are comparing a model areal grid to a measurement point, which are assumed to be**  
36 **equivalent.** The simulations are in closer agreement with the observed VWC at Athenry,  
37 **Claremorris** and Johnstown Castle with the lowest error statistics (RMSE  $\approx 0.1 \text{ m}^3 \text{ m}^{-3}$



1 <sup>3</sup>, PBIAS < 25%) relative to other stations (Figure A1). The lowest model performance  
2 occurs at Dunsany, Valentia and Dripsey, with RMSD > 0.15 m<sup>3</sup> m<sup>-3</sup>, PBIAS > 30%.  
3 The Pearson's correlation is generally high, above 0.8, across the measurement sites  
4 except for Ballyhaise and Claremorris. Both experiments broadly underestimate the  
5 observed VWC values, but the model bias is lower in the STATSGO than the  
6 SOILGRIDS experiment, consistent across the stations (Figure A1). These dry biases  
7 (0.15 - 0.4 m<sup>3</sup> m<sup>-3</sup>) are broadly dominated in autumn and winter during which the VWC  
8 values are higher or soil is assumed to be relatively wetter (Figure 5 a-f), except at  
9 Dripsey where the dry biases are systematic throughout the years (Figure 5g).  
10 Conversely, in summer where soil moisture conditions tend to dry in response to  
11 atmospheric changes (e.g. higher global solar radiation and evaporation), VWC  
12 temporal patterns are adequately captured by both model experiments (biases are less  
13 than 0.1 m<sup>3</sup> m<sup>-3</sup>), including the 2018 exceptionally dry summer soil moisture content  
14 (Figure 5f). The differences between STATSGO and SOILGRIDS are relatively small  
15 (< 0.05 m<sup>3</sup> m<sup>-3</sup>) across the year(s).

16 Figure 5 (boxplot) further illustrates the summary statistics and spread of model  
17 simulations and observed VWC. The mean of observed VWC (≈0.3 m<sup>3</sup> m<sup>-3</sup>) is better  
18 captured in STATSGO than the SOILGRIDS, particularly at Athenry, Ballyhaise,  
19 Claremorris and Johnstown Castle. However, with the mean of observed VWC  
20 exceeding this value, both experiments lead to significant underestimation of VWC, as  
21 evident at Dunsany, Valentia and Dripsey.

22 Overall, the model experiments **closely replicate** both the mean and variance of the  
23 measured surface VWC values at Athenry, Claremorris and Johnstown Castle  
24 locations, where the soils are either well- or imperfectly-drained (Figure 1a).

25

#### 26 *Using reference ASCAT satellite SWI data*

27 The selected measurement stations are well distributed and represent different soil  
28 moisture regimes across Ireland (Figure 1a). However, given the relatively small  
29 number of stations, generalizing the results to the entire domain may be erroneous.

30 Instead, model grid cells are individually evaluated against **the reference ASCAT**  
31 **satellite data**. Figure 6 shows the results of all Ireland grid-scale model evaluation of  
32 daily derived RSM values against the reference SWI at the surface and subsurface for  
33 2018 dry and 2019 normal years. Median metrics for each soil texture category in  
34 STATSGO and SOILGRIDS are presented in Tables 5 and 6.

35 As shown in Figure 6 (top) for the 2018 dry year, model performance is broadly better  
36 for STATSGO than for SOILGRIDS, with lower median (black crossbar); RMSD of  
37 around 0.015%, PBIAS of 1% in magnitude of ASCAT SWI, for both surface and

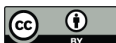

1 subsurface RSM grid values. While the Pearson's R statistic (median around 0.85) for  
2 STATSGO and SOILGRIDS is comparable for the surface layer, the SOILGRIDS  
3 experiment produces a higher R value in the subsurface layer during the dry year. For  
4 the 2019 normal year (Figure 6, bottom), the spatial distribution of error statistics at  
5 the surface layer is nearly similar for both experiments, with median RMSD of 0.015 %,  
6 PBIAS of around 6 % (1 % for SOILGRIDS) and R of 0.73. At the subsurface layer,  
7 SOILGRIDS produces better results than STATSGO with lower RMSD (0.01 %) and  
8 PBIAS (6%) distributions and higher R statistics (median around 0.76).

9 The extended tails (positive/negative in PBIAS and lower/higher in RMSD and R) in  
10 the density distribution indicate a relatively small number of isolated (spatial) grid cells  
11 with larger error statistics. Given that the Loam (L) and Sandy Loam (SL) soils  
12 represent the largest proportion of grid cells across the study domain and are relatively  
13 comparable in terms of spatial coverage in STATSGO and SOILGRIDS (Table 2), the  
14 error statistics for these soil texture categories are explained here. For 2018, results  
15 show that both experiments produce lower RMSD and PBIAS error statistics for SL  
16 than L at the surface layer (Table 5). Whereas at the subsurface layer, SOILGRIDS  
17 perform better than STATSGO for both soil categories. For the 2019 normal year  
18 (Table 6), STATSGO gives lower RMSD and PBIAS error statistics than SOILGRIDS  
19 at the surface layer. Overall, model performs better over L soil type than SL based on  
20 the lower PBIAS and higher R values. The RMSD and R statistics are relatively  
21 comparable at the subsurface layer for both the STATSGO and SOILGRIDS  
22 simulations and for L and SL soil categories. However, STATSGO produces lower  
23 PBIAS statistics than SOILGRIDS in L soil. Generally, the error statistics are lower in  
24 L than SL soil at the sub surface layer.

25 The spatial characteristics of model surface RSM annual mean bias relative to the  
26 reference datasets for the years 2018 and 2019 are illustrated in Figure 7 a-j, and the  
27 long-term seasonal characteristics of topsoil VWC between the experiments are shown  
28 in Figure A2. Wet biases are predominant in the north, characterised as SL in  
29 STATSGO and SOILGRIDS; towards the south and southeast of the domain, the  
30 results shift towards a dry bias, mostly in areas represented by L soils. While the spatial  
31 coverage of model bias is consistent for both experiments and the years, the dry bias  
32 in both years is more pronounced in SOILGRIDS than STATSGO in the affected areas.  
33 Conversely, the wet bias is more widespread in STATSGO than SOILGRIDS.

34

### 35 3.2 Model evaluation: Soil temperature

36 Figure 8 (a-g) illustrates model comparisons against the reference station  
37 measurements of top soil temperature, while Figure A3 shows the associated

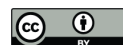

1 evaluation results. Generally, the error statistics (RMSD and PBIAS) for both the  
2 STATSGO and SOILGRIDS experiments are low, and R values are high (above 0.9  
3 across all sites). The model errors are better RMSD < 3 K and PBIAS < 1% in Athenry,  
4 Dunsany, Valentia and Johnstown Castle, than in Ballyhaise, Claremorris and Dripsey  
5 where the errors exceeded these values. Comparatively, SOILGRIDS leads to a  
6 slightly better model performance than STATSGO across the sites.  
7 Additionally, the soil temperature increases from around 280 K in winter to a peak of  
8 about 297 K in summer, and up to 300 K during the extreme hot and dry summer of  
9 2018 (e.g. Johnstown Castle) (Figure 8f). The spread and variance of the observed  
10 soil temperature are reasonably replicated by both experiments (Figure 8, bottom).  
11 Whereas the mean of observed soil temperature, which is approximately 285 K, is  
12 systematically underestimated by 1 K to 3 K across stations, the peak values in the  
13 mid-summer months are well captured by the experiments (Figure 8a-g).  
14 Overall, both STATSGO and SOILGRIDS produce soil temperature profiles that are  
15 close, but significantly different ( $p\text{-value} < 2.2 \times 10^{-16}$ ) and are comparable with  
16 observations for the study year(s) and locations.  
17 **Given the reasonable model performance across the selected locations, the grid-scale**  
18 **model differences between STATSGO and SOILGRIDS in the absence of satellite**  
19 **reference observations, is further examined (Figure 9).** The spatial differences of  
20 surface soil temperature are based on the seasonal long-term climatology from 2009  
21 to 2022. In response to seasonal variations in global solar radiation and VWC, winter  
22 shows the lowest soil temperature (Figure 9 a,e,i), whereas summer is characterised  
23 by the highest soil temperature (Figure 9 c,g,k). The highest soil temperature in  
24 summer are widespread mostly over Loam soil in the south and southeast of the study  
25 domain. The south and east are seasonally drier, experiencing lower rainfall and soil  
26 water deficits in summer (Figures 1a and A4). In other seasons, the spatial  
27 characteristics are irregular. This spatiotemporal evolution of the soil temperature  
28 characteristics is consistent in both STATSGO and SOILGRIDS model experiments.  
29 That is, both soil texture maps produce soil temperature differences that are negligible  
30 mostly in the south and southeast dominated by Loam soils (Figure 9 i-l). However,  
31 STATSGO broadly shows a cold soil temperature bias in Clay and Clay Loam soils,  
32 and a small warm bias over Sandy Loam in the northern border and southwest, relative  
33 to SOILGRIDS. The areas of cold and warm biases broadly coincide with areas of wet  
34 and dry biases of STATSGO VWC in comparison with SOILGRIDS (Figure A2).

35

36 3.3 Spatial and temporal evolution of soil moisture drought



1 Figure 10 illustrates the spatial characteristics of 0-100 cm RSM percentiles for  
2 selected days during summer 2018. The days are used to denote the start, peak and  
3 end of summer water deficits (Figure 4 f). For the first 7-day window ending 07 June,  
4 the southeast and east of Ireland broadly show low drought intensity D0-D1  
5 (abnormal/moderate) in STATSGO, relative to SOILGRIDS with severe drought D2  
6 category. Both experiments are largely consistent in other areas of the study domain.  
7 For example, the major land areas in the north of the island are characterised as  
8 severe drought D2, and D0-D1 in the midlands and west of Ireland. However, the D0-  
9 D1 categories are more spatially widespread across the midlands and west in  
10 SOILGRIDS than in STATSGO.

11 By the middle of summer 2018 (sixth week ending 12 July), the entire Ireland is  
12 dominated by exceptional drought D4 category in STATSGO, except for the land areas  
13 in the north where the D2 category is sustained over time. These patterns are  
14 consistent in SOILGRIDS except for some areas with higher intensity. For example,  
15 the drought category in the southeast of Northern Ireland shifts from D2 in STATSGO  
16 to D3-D4 (extreme and exceptional) categories, and from D2-D3 (severe and extreme)  
17 category in the southwest of Ireland to D3-D4 drought categories in SOILGRIDS.

18 Whereas the soil water deficits appear to have improved by the end of summer (week  
19 13 ending 30 August), the landscapes are still largely under different levels of soil  
20 dryness. For example, in STATSGO, moderate drought D1 category broadly  
21 dominates the Loam soil texture areas in the midlands, south and southeast of Ireland,  
22 while a mix of drought D1-D4 categories dominates the west and southwest of the  
23 country. These patterns are consistent in SOILGRIDS, but areas in the northern border,  
24 west and southwest with a sustained D3-D4 categories are wider in SOILGRIDS than  
25 STATSGO.

26 Figure 11 illustrates the time-areal coverage cross-section of various drought  
27 categories over the domain during the summer period 2018, based on RSM percentiles.  
28 While the landscapes are already under soil water deficits by the start of summer in  
29 June, the largest areal coverage (about 70 % in STATSGO and 80 % in SOILGRIDS)  
30 is dominated by low drought intensities (D0-D2). Approximately 10 % of the domain is  
31 characterised by extreme and exceptional D3-D4 drought, up to the end of June. The  
32 drought intensifies effectively from late June, with higher areal coverage of D4 category  
33 of more than 80 %, extending for several days in STATSGO. This is similar in  
34 SOILGRIDS, however, days in July that show recovery based on a reduced areal  
35 coverage of D3-D4 category in STATSGO, show high coverage of the same intensities  
36 in SOILGRIDS. At the start of August, the areal coverage of high intensity D3-D4  
37 drought has effectively dropped, compensated by an increase in the spatial coverage



1 of D0-D2. In the last week of August, the areal coverage of D0-D1 is higher (about  
2 80 %) relative to other drought categories.

3

#### 4 **4. Discussions**

5 4.1 Effects of soil hydrophysical properties on simulated soil hydrothermal regimes.

6 As a consequence of misrepresentation of soil texture classes in LSMs, soil  
7 hydrophysical properties are expected to influence model simulations of changes in  
8 soil moisture content and soil temperature across space and time. In this study, we  
9 investigate the difference between two commonly used global soil texture maps  
10 implemented in NOAH-MP land surface model, namely STATSGO and SOILGRIDS.  
11 The impact of using the default look-up table and PedoTransfer Functions (PTFs) to  
12 prescribe grid-scale soil properties (e.g. porosity, field capacity, wilting point, hydraulic  
13 conductivity, etc.), on simulated surface and subsurface soil hydrothermal changes  
14 during normal period and extremely dry year is further evaluated. **The role of these  
15 properties, particularly the field capacity – a measure of water retained in the soil at  
16 the pressure of -0.33 bar, after excess rain water has drained off, are critical in LSMs  
17 that simulate soil hydrophysical processes and interactions with the atmosphere.**

18 At point-scale, the results reveal model differences between dry and wet soil moisture  
19 regimes and are able to fairly replicate the measured values of soil moisture and soil  
20 temperature across a variety of weather conditions, including during extreme water  
21 shortage. While STATSGO is closer to observations than SOILGRIDS, the model  
22 errors between these data sources are marginal but statistically significant ( $p$ -value <  
23  $2.2 \times 10^{-16}$ ) for both variables, notwithstanding the difference in soil physics. Despite  
24 misrepresentation of soil texture class by both sources, for example at Johnstown  
25 Castle (Table 1), the model does reasonably well. **However, for a relatively wet site  
26 (e.g. Dripsey) where the soil texture class is accurately represented in both soil  
27 databases, the model systematically underestimates soil moisture content (Figures 5g  
28 and A1).** This illustrates that the soil-induced model uncertainty is rarely linked to  
29 misrepresentation of soil texture class, but to the soil physics and the prescribed soil  
30 hydrophysical parameters.

31 For example, the field capacity (FC) value reported for Johnstown Castle (Table 1) is  
32  $0.32 \text{ m}^3 \text{ m}^{-3}$  (Ishola et al., 2020), which is close to the values employed in STATSGO  
33 and SOILGRIDS, and consistent with station measurements (Figures 3 and 4).  
34 However, the observed FC value in Dripsey is approximately  $0.42 \text{ m}^3 \text{ m}^{-3}$  (Table 1),  
35 which contrasts the values of approximately  $0.31 \text{ m}^3 \text{ m}^{-3}$  used in the models (Figure 3  
36 and 4 bottom) and values reported in Liu et al. (2012) and Ishola et al. (2020) for this  
37 site. The bias in FC limits the ability of the soil to increase the memory of the stores,



1 resulting in systematic bias in the simulated VWC. To illustrate the role of prescribed  
2 FC values for Dripsey, the simulated VWC for a neighboring grid cell with a FC of 0.412  
3  $\text{m}^3 \text{m}^{-3}$  and similar weather condition is evaluated against the measured VWC (Figure  
4 12). A higher FC clearly results in higher VWC values, reducing the bias between  
5 observations and STATSGO by more than 50 % of the value at Dripsey. In contrast,  
6 the maximum FC derived from SOILGRIDS across the domain is 0.34  $\text{m}^3 \text{m}^{-3}$  (Figure  
7 3), which still lies around the default value, and is not in a proximal grid location to  
8 Dripsey site. Hence, using the same grid cell as above, the SOILGRIDS with PTFs fall  
9 short of this illustration and consequently fail to improve the simulated VWC.

10 At grid-scale, the STATSGO and SOILGRIDS soil texture data are evidently different,  
11 particularly in the north, west and southwest of Ireland (Figure 2). Notably, the  
12 STATSGO data represents smaller soil grain sizes in most of these areas, relative to  
13 SOILGRIDS. This results in higher values of soil hydrophysical properties in STATSGO,  
14 including porosity and field capacity (Figure 3). The increasing grain size leads to wet  
15 and cold biases in STATSGO, relative to SOILGRIDS in these notable areas (Figures  
16 7, 9 and A2). Similar to our results, It has been demonstrated that a reduction in soil  
17 grain size (e.g. Loam to Sandy Loam) leads to dry and hot biases (decrease in latent  
18 heat flux and increase in sensible heat flux) between two global soil datasets (Dennis  
19 and Berbery, 2021).

20

21 While the choice of PTFs is critical in model simulations of soil water fluxes  
22 (Weihermüller et al. 2021), the default Saxton and Rawls (2006) soil physics produce  
23 properties that are very close to using the look-up table in NOAH-MP model. One  
24 reason for this similarity is that the SOILGRIDS sand and clay compositions produce  
25 Loam and Sandy Loam soil texture, based on USDA classes, and these coincide with  
26 FAO/STATSGO in space with nearly the same areal coverage (Figure 2 and Table 2).  
27 Another reason for similar soil properties between the PTFs and look-up table, is the  
28 default PTFs coefficients which are derived based on USDA soil samples (Saxton and  
29 Rawls, 2006) and may be inaccurate for the study domain; the empirically-derived look-  
30 up table is also based on soil samples in the US. The net effect of similar but inaccurate  
31 soil properties is the significant under-representation of soil hydrothermal regimes in  
32 wet soils as illustrated in Figures 5 and 7. This aligns with Vereecken et al. (2010) who  
33 demonstrated that PTFs are highly accurate over the areas for which they have been  
34 developed, but have limited accuracy if transferred outside these areas.

35 The overall results indicate that there is a major impact of under-represented soil  
36 hydrophysical parameters, particularly in relatively wet sites, regardless of the source  
37 of global soil texture map and soil physics option implemented in NOAH-MP. The





1 discrepancies between STATSGO and SOILGRIDS exert great regional impacts on  
2 the soil hydrothermal regimes.

3

#### 4 4.2 Implications for regional drought monitoring

5 Soil moisture content is an essential variable in many hydrological applications and in  
6 understanding the evolution and characteristics of extreme climate events such as  
7 droughts. Instead of heatwaves, the study domain is rather subject to rainfall extremes  
8 (Noone et al., 2017), a precursor of soil water deficits and droughts; the intensity and  
9 frequency of which have been projected to increase globally and in the study domain  
10 by the end of century (Seneviratne et al., 2012; Fealy et al., 2018).

11 In this study, the drought analysis are based on the cumulative RSM percentiles  
12 aggregated over three uppermost soil layers (0-100 cm) for 2018 summer hydrological  
13 extremes for STATSGO and SOILGRIDS (Figures 10-11). The 0-100 cm depth is  
14 sufficient for drought assessment since the root zone of many crops grown across the  
15 world does not surpass 1.0 m in depth (Fan et al., 2016; Grillakis et al., 2019).

16 Both STATSGO and SOILGRIDS are largely consistent in terms of the evolution of soil  
17 moisture drought in space and time. However, SOILGRIDS shows higher drought  
18 intensity in the many areas, relative to STATSGO. This is due to the dry bias of  
19 SOILGRIDS associated with underrepresented soil hydrophysical properties and  
20 simulated VWC (Figures 3 and A2). During the summer of 2018, particularly from late  
21 May to late July, Ireland was reported to have experienced different degrees of  
22 meteorological droughts (rainfall deficits) (Figure 4 f) ranging from dry spells to  
23 absolute droughts (Met Éireann Report, 2018; Falzoi et al., 2019; Moore, 2020).  
24 Meteorological droughts precede soil moisture/agricultural droughts through reduction  
25 in soil water storage and available water for plant uptake, our results indicate that  
26 extreme to exceptional soil moisture droughts are only effective from last week in June,  
27 covering the large part of the domain by mid-July (Figure 11). During August, rainfall  
28 improved soil water stores (Figure 4 f) and weakened drought conditions across much  
29 of the country, particularly in the north and west (Met Éireann Report, 2018; Moore,  
30 2020).

31 Overall, the discrepancies between STATSGO and SOILGRIDS impacts drought  
32 characteristics mostly in space, with SOILGRIDS shifting the  
33 abnormal/moderate/severe droughts in STATSGO to extreme/exceptional droughts.  
34 These may result in erroneous or potential loss of vital information with dire  
35 consequences on ecosystems with regards to predicting the response and productivity,  
36 as drought stress has been highlighted as the primary factor limiting ecosystem  
37 response and productivity (De Boeck et al., 2011).



1

2

### 3 **5. Conclusions**

4 In this study, the usability of two global soil datasets for representing soil processes in  
5 NOAH-MP model and simulating soil hydrothermal variations and associated extremes,  
6 has been evaluated across all of Ireland. Specifically, FAO/STATSGO dominant soil  
7 texture categories linked to an empirically-derived soil hydrophysical properties from a  
8 look-up table (default in WRF), are compared with PedoTransfer Functions (PTFs) that  
9 ingest an alternative SOILGRIDS sand and clay compositions at four soil layers.  
10 Through temporal comparison with in situ soil moisture and soil temperature  
11 observations, it has been found that, both soil datasets can **fairly replicate** the general  
12 soil hydrothermal variations. However, they under-represent the soil properties (e.g.  
13 field capacity) in wet loam soil, leading to systematic dry bias in soil moisture. The  
14 results have further shown that there is no distinct difference between the soil physics  
15 applied to the same soil texture category in both STATSGO and SOILGRIDS. But, the  
16 disparities and sensitivity to soil physics increase for different soil texture categories  
17 between the datasets.

18 Through spatial comparison with satellite-based ASCAT SWI, dry bias is more  
19 pronounced and widespread in the midland, south and east in SOILGRIDS, while wet  
20 bias dominates the west and north. As a consequence, 2018 summer soil moisture  
21 droughts broadly intensify more in SOILGRIDS than in STATSGO. **These disparities**  
22 **may result in misinformation that could hamper adequate and effective preparation and**  
23 **response during drought episodes.** While identifying the better soil database is not the  
24 primary objective of this study, STATSGO performs slightly better than SOILGRIDS.  
25 Overall, the study highlights the shortcomings of global soil databases in simulating  
26 soil hydrothermal changes and underscore the need to optimize and improve global  
27 soil hydrophysical properties that are ingested in LSMs for better performance.  
28 Developing detailed regional soil texture properties may be more realistic and enables  
29 more improvement in model simulations. Ultimately, this would advance the  
30 understanding of the role of soil processes in hydrologic cycle, ecosystem productivity,  
31 drought evolution, land-atmosphere interactions and regional climate.

32 A number of initiatives (e.g. Terrain-AI) has been developed to deploy soil moisture  
33 measuring network across Ireland to address the lack of soil moisture observations. A  
34 significant conclusion of this study is that the NOAH-MP model has shown an excellent  
35 capacity to ingest better alternative soil texture data, to reduce the model biases of soil  
36 hydrothermal changes and evolution of soil moisture drought. Therefore, it can be  
37 applied to augment current network of sites across the country for operational modeling



1 and real-time forecasting of soil moisture conditions and drought across the domain.  
2 This will support hydrometeorological monitoring similar to Global Food Awareness  
3 System (GloFAS) and NASA's Short-term Prediction Research and Transition with  
4 Land Information System (SPoRT-LIS).

5

#### 6 **Code and data availability**

7 The open-source HRLDAS/NOAH-MP model is freely available on github  
8 (<https://github.com/NCAR/hrldas>). The ERA5-Land hourly input meteorological forcing were  
9 downloaded from the climate data store (<https://cds.climate.copernicus.eu/>). The WPS  
10 geographical data were downloaded from NCAR ([https://ral.ucar.edu/model/noah-](https://ral.ucar.edu/model/noah-multiparameterization-land-surface-model-noah-mp-lsm)  
11 [multiparameterization-land-surface-model-noah-mp-lsm](https://ral.ucar.edu/model/noah-multiparameterization-land-surface-model-noah-mp-lsm)). 2018 Corine land use and satellite  
12 ASCAT soil water index are freely available on Copernicus Global Land Service  
13 (<https://land.copernicus.eu/global/index.html>). In situ data for the selected sites were obtained  
14 from Met Eireann, Ireland and from the European fluxes database cluster ([http://www.europe-](http://www.europe-fluxdata.eu)  
15 [fluxdata.eu](http://www.europe-fluxdata.eu)).

16

#### 17 **Competing interests**

18 The contact author has declared that none of the authors has any competing interests.

19

#### 20 **Acknowledgments**

21 We thank Gary Lanigan for granting access to measurements from Johnstown Castle.  
22 Computing resources for model runs in this work were provided by the Microsoft Azure high  
23 performance computers. This research under the Terrain-AI project (SFI 20/SPP/3705) has  
24 been supported by Science Foundation Ireland Strategic Partnership Programme and co  
25 funded by Microsoft.

26

#### 27 **Author Contributions**

28 Conceptualization, K. I. and R. F.; methodology, K.I. and R.F.; software, K.I. and R. F. with  
29 contributions by P. L. and D. W. ; validation, K. I.; formal analysis, K. I.; investigation, K. I.;  
30 resources, K.I. and R.F.; data curation, K. I.; writing—draft preparation and review, was led by  
31 K. I., G. M., M.D. and R. F., with contributions from all co-authors.; visualization, K.I.;  
32 supervision, R.F. and G. M.; project administration, R.F. and T.M.; funding acquisition, R.F. and  
33 T.M.

34

35

#### 36 **References**

37 Albergel, C., Rüdiger, C., Pellarin, T., Calvet, J.-C., Fritz, N., Froissard, F., Suquia, D., Petitpa,  
38 A., Pignatelli, B., and Martin, E.: From near-surface to root-zone soil moisture using an exponential  
39 filter: an assessment of the method based on in-situ observations and model simulations,  
40 *Hydrol. Earth Syst. Sci.*, 12, 1323–1337, <https://doi.org/10.5194/hess-12-1323-2008>, 2008

41

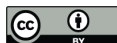

- 1 Albergel, C., de Rosnay, P., Gruhier, C., Muñoz-Sabater, J., Hasenauer, S., Isaksen, I., Kerr,  
2 Y., and Wagner, W.: Evaluation of remotely sensed and modelled soil moisture products using  
3 global ground-based in situ observations, *Remote Sens. Environ.*, 118, 215–  
4 226, <https://doi.org/10.1016/j.rse.2011.11.017>, 2012  
5  
6 Arsenault, K. R., Nearing, G. S., Wang, S., Yatheendradas, S., and Peters-Lidard, C. D.:  
7 Parameter sensitivity of the Noah-MP land surface model with dynamic vegetation. *J.*  
8 *Hydrometeorol.* 19, 815–830. doi: 10.1175/jhm-d-17-0205.1, 2018  
9  
10 Barlage, M., Tewari, M., Chen, F., Miguez-Macho, G., Yang, Z.-L., & Niu, G.-Y.: The effect of  
11 groundwater interaction in North American regional climate simulations with WRF/Noah-MP.  
12 *Climatic Change*, 129(3–4), 485–498. <https://doi.org/10.1007/s10584-014-1308-8>, 2015  
13  
14 Beck, H. E., Pan, M., Miralles, D. G., Reichle, R. H., Dorigo, W. A., Hahn, S., Sheffield, J.,  
15 Karthikeyan, L., Balsamo, G., Parinussa, R. M., van Dijk A. I. J. M., Du, J., Kimball, J. S.,  
16 Vergopolan, N., Wood, E. F.: Evaluation of 18 satellite- and model-based soil moisture products  
17 using in situ measurements from 826 sensors. *Hydrology and Earth System*  
18 *Sciences*, 25(1), 17– 40. <https://doi.org/10.5194/hess-25-17-2021>, 2021  
19  
20 Blyth, E.M., Arora, V.K., Clark, D.B., Dadson, S. J., De Kauwe, M. G., Lawrence, D. M.,  
21 Melton, J. R., Pongratz, J., Turton, R. H., Yoshimura, K., Yuan, H.: Advances in Land Surface  
22 Modelling. *Curr Clim Change Rep* 7, 45–71. <https://doi.org/10.1007/s40641-021-00171-5>,  
23 2021  
24  
25 Chang, M., Cao, J., Zhang, Q., Chen, W., Wu, G., Wu, L., Wang, W., Wang, X.: Improvement  
26 of stomatal resistance and photosynthesis mechanism of Noah-MP-WDDM (v1.42) in  
27 simulation of NO<sub>2</sub> dry deposition velocity in forests, *Geoscientific. Model Development*, 15,  
28 787-801, <https://doi.org/10.5194/gmd-15-787-2022>, 2022  
29  
30 Chen, F., Mitchell, K., Schaake, J., Xue, Y., Pan, H. L., Koren, V., Duan, Q. Y., Ek, M., Betts,  
31 A.: Modeling of land surface evaporation by four schemes and comparison with FIFE  
32 observations. *Journal of Geophysical*  
33 *Research*, 101, 7251– 7268. <https://doi.org/10.1029/95JD02165>, 1996  
34  
35 Chen, F., Manning, K. W., Lemone, M. A., Trier, S. B., Alfieri, J. G., Roberts, R., Tewari, M.,  
36 Niyogi, D., Horst, T. W., Oncley, S. P., Basara, J. B., and Blanken, P. D.: Description and  
37 evaluation of the characteristics of the NCAR high-resolution land data assimilation system, *J.*  
38 *Appl. Meteorol. Clim.*, 46, 694–713, <https://doi.org/10.1175/JAM2463.1>, 2007  
39  
40 Creamer, R.E., Simo, I., Reidy, Carvalho, J., Fealy, R., Hallett, S., Jones, R., Holden, A.,  
41 Holden, N., Hannam, J., Massey, P., Mayr, T., McDonald, E., O'Rourke, S., Sills, P., Truckell,  
42 I., Zawadzka, J. and Schulte, R.P.O. 2014. Irish Soil Information System. Synthesis Report  
43 (2007-S-CD-1-S1). EPA STRIVE Programme, Wexford.  
44  
45 Dai, Y., Shangguan, W., Wei, N., Xin, Q., Yuan, H., Zhang, S., Liu, S., Lu, X., Wang, D., Yan,  
46 F.: A review of the global soil property maps for Earth system models, *Soil*, 5, 137-158,  
47 <https://doi.org/10.5194/soil-5-137-2019>, 2019a  
48  
49 Dai, Y., Xin, Q., Wei, N., Zhang, Y., Shangguan, W., Yuan, H., Zhang, S., Liu, S., Lu, X.: A  
50 global high-resolution data set of soil hydraulic and thermal properties for land surface modeling,  
51 *J. Adv. Model. Earth Syst.*, 11, 2996-3023, <https://doi.org/10.1029/2019MS001784>, 2019b  
52  
53 De Boeck, H.J., Dreesen, F. E., Janssens, I. A., Nijs, I.: Whole-system responses of  
54 experimental plant communities to climate extremes imposed in different seasons. *New*  
55 *Phytologist*, 189, 806-817. doi: 10.1111/j.1469-8137.2010.03515.x, 2011  
56  
57 de Lannoy, G. J. M., R. D. Koster, R. H. Reichle, S. P. P. Mahanama, and Q. Liu: An updated  
58 treatment of soil texture and associated hydraulic properties in a global land modeling system. *J.*  
59 *Adv. Model. Earth Syst.*, 6, 957–979, <https://doi.org/10.1002/2014MS000330>, 2014



- 1  
2 Dennis, E. J., Berbery, E. H.: The role of soil texture in local land surface-atmosphere coupling  
3 and regional climate, *J. Hydromet.*, 22, 313-330, <https://doi.org/10.1175/JHM-D-20-0047.1>,  
4 [2021](https://doi.org/10.1175/JHM-D-20-0047.1)  
5  
6 Dennis, E. J., Berbery, E. H.: The effects of soil representation in WRF-CLM on the atmospheric  
7 moisture budget, *J. Hydromet.*, 23, 681-696, <https://doi.org/10.1175/JHM-D-21-0101.1>, [2022](https://doi.org/10.1175/JHM-D-21-0101.1)  
8  
9 Falzoi, S., Gleeson, E., Lambkin, K., Zimmermann, J., Marwaha, R., O'Hara, R., Green,  
10 S. and Fratianni, S.: Analysis of the severe drought in Ireland in 2018. *Weather*, 99, 1–  
11 6. <https://doi.org/10.1002/wea.3587>, 2019  
12  
13 Fan, J., B. McConkey, H. Wang, H. Janzen: Root distribution by depth for temperate  
14 agricultural crops, *Field Crop Res.*, 189, 68-74, 10.1016/J.FCR.2016.02.013, 2016  
15  
16 FAO: Digital soil map of the world and derived soil properties, FAO, Land and Water Digital  
17 Media Series, CD-ROM., 2003a  
  
18 FAO: The Digitized Soil Map of the World Including Derived Soil Properties (version 3.6), FAO,  
19 Rome, Italy, 2003b  
  
20 Fealy, R. Bruyère, C., Duffy, C.: Regional Climate Model Simulations for Ireland for the 21st  
21 Century, Final Report. Environmental Protection Agency, Co. Wexford, 1-137, 2018  
22  
23 Fisher, R. A., Koven, C. D.: Perspectives on the Future of Land Surface Models and the  
24 Challenges of Representing Complex Terrestrial Systems, *J. Adv. Model. Earth Sys.*, 12,  
25 e2018MS001453, <https://doi.org/10.1029/2018MS001453>, [2020](https://doi.org/10.1029/2018MS001453)  
26  
27 Gee, G.W., Bauder, J.W.: Particle-size Analysis, in: Klute, A. (Ed.), SSSA Book Series. Soil  
28 Science Society of America, American Society of Agronomy, Madison, WI, USA, pp. 383–411.  
29 <https://doi.org/10.2136/sssabookser5.1.2ed.c15>, [2018](https://doi.org/10.2136/sssabookser5.1.2ed.c15)  
30  
31 Grillakis, M. G.: Increase in severe and extreme soil moisture droughts for Europe under climate  
32 change, *Science of the Total Environment*, 660, 1245-1255,  
33 <https://doi.org/10.1016/j.scitotenv.2019.01.001>, 2019  
34  
35 He, J. J., Y. Yu, L. J. Yu, C. M. Yin, N. Liu, S. P. Zhao, and X. Chen: Effect of soil texture and  
36 hydraulic parameters on WRF simulations in summer in east China. *Atmos. Sci. Lett.*, 17, 538–  
37 547, <https://doi.org/10.1002/asl.690>, 2016  
38  
39 He, Q., Lu, H., Yang, K.: Soil Moisture Memory of Land Surface Models Utilized in Major  
40 Reanalyses Differ Significantly from SMAP Observation, *Earth's Future*, 11, e2022EF003215,  
41 <https://doi.org/10.1029/2022EF003215>, [2023](https://doi.org/10.1029/2022EF003215)  
42  
43 Hengl, T., Mendes de Jesus, J., Heuvelink, G. B. M., Ruiperez Gonzalez, M., Kilibarda, M.,  
44 Blagotic, A., Shangguan, W., Wright, M. N., Geng, X., Bauer-Marschallinger, B., Guevara, M.  
45 A., Vargas, R., MacMillan, R. A., Batjes, N. H., Leenaars, J. G. B., Ribeiro, E., Wheeler, I.,  
46 Mantel, S., and Kempen, B.: SoilGrids250m: global gridded soil information based on Machine  
47 Learning, *PLOS One*, 12, e0169748, <https://doi.org/10.1371/journal.pone.0169748>, [2017](https://doi.org/10.1371/journal.pone.0169748)  
48  
49 Hosseini, A., Mocko, D. M., Brunzell, N. A., Kumar, S. V., Mahanama, S., Arsenault, K., Roundy,  
50 J. K. : Understanding the impact of vegetation dynamics on the water cycle in the Noah-MP  
51 model, *Front. Water*, 4, 2022, <https://doi.org/10.3389/frwa.2022.925852> , [2022](https://doi.org/10.3389/frwa.2022.925852)  
52  
53 Hu, W., Ma, W., Yang, Z.-L., Ma, Y., and Xie, Z.: Sensitivity analysis of the Noah-MP land  
54 surface model for soil hydrothermal simulations over the Tibetan Plateau. *Journal of Advances*  
55 *in Modeling Earth Systems*, 15, e2022MS003136. <https://doi.org/10.1029/2022MS003136>,  
56 [2023](https://doi.org/10.1029/2022MS003136)  
57



- 1 Ishola, K.A., Mills, G., Fealy, R.M., Ní, C.Ó. and Fealy, R.: Improving a land surface scheme  
2 for estimating sensible and latent heat fluxes above grassland with contrasting soil moisture  
3 zones. *Agricultural and Forest Meteorology*, 294,108151. <https://doi.org/10.1016/j.agrformet.2020.108151>, 2020  
4  
5  
6 Ishola, K. A., Mills, G., Fealy, R. M., Fealy, R.: A model framework to investigate the role of  
7 anomalous land surface processes in the amplification of summer drought across Ireland during  
8 2018, *International Journal of Climatology*, 43, 480 - 498. <https://doi.org/10.1002/joc.7785>,  
9 2022  
10  
11 Jordan, R.: A one-dimensional temperature model for a snow cover: Technical documentation  
12 for SNTHERM 89, US Army Cold Regions Research and Engineering Laboratory Special  
13 Report 91-16, 49, 1991  
14  
15 Keane, T. and Collins, J.F. (Eds.): Climate, Weather and Irish Agriculture, AGMET, UCD,  
16 Belfield, Dublin 4, 2004  
17  
18 Kiely, G., Leahy, P., Lewis, C., Sottocornola, M., Laine, A., Koehler, A.-K.: GHG Fluxes from  
19 Terrestrial Ecosystems in Ireland. Research report No. 227.EPA Research Programme,  
20 Wexford. Available online at  
21 [https://www.epa.ie/pubs/reports/research/climate/Research\\_Report\\_227.pdf](https://www.epa.ie/pubs/reports/research/climate/Research_Report_227.pdf), 2018  
22  
23 Kishné, A. S., Y. T. Yimam, C. L. S. Morgan, and B. C. Dornblaser: Evaluation and  
24 improvement of the default soil hydraulic parameters for the Noah land surface  
25 model. *Geoderma*, 285, 247–259, <https://doi.org/10.1016/j.geoderma.2016.09.022>, 2017  
26  
27 Kumar, S. V., Holmes, T. R., Bindlish, R., de Jeu, R., and Peters-Lidard, C.: Assimilation of  
28 vegetation optical depth retrievals from passive microwave radiometry, *Hydrol. Earth Syst. Sci.*,  
29 24, 3431–3450, <https://doi.org/10.5194/hess-24-3431-2020>, 2020  
30  
31 Lehmann, P., O. Merlin, P. Gentine, and D. Or: Soil texture effects on surface resistance to  
32 bare-soil evaporation. *Geophys. Res. Lett.*, 45, 10 398–  
33 10 405, <https://doi.org/10.1029/2018GL078803>, 2018  
34  
35 Li, J., Chen, F., Zhang, G., Barlage, M., Gan, Y., Xin, Y., Wang, C.: Impacts of land cover and  
36 soil texture uncertainty on land model simulations over the Central Tibetan Plateau, *J. Adv.  
37 Model. Earth Syst.*, 10, 2121-2146, <https://doi.org/10.1029/2018MS001377>, 2018  
38  
39 Liu, W., Xu, X. and Kiely, G.: Spatial variability of remotely sensed soil moisture in a temperate-  
40 humid grassland catchment. *Ecohydrol.*, 5: 668-676. <https://doi.org/10.1002/eco.254>, 2012  
41  
42 Looy, K. V., Bouma, J., Herbst, M., Koestel, J., Minasny, B., Mishra, U., Montzka, C., Nemes,  
43 A., Pachepsky, Y. A., Padarian, J., Schaap, M. G., Tóth, B., Verhoef, A., Vanderborght, J.,  
44 Ploeg, M. J., Weihermüller, L., Zacharias, S., Zhang, Y., and Vereecken, H.: Pedotransfer  
45 Functions in Earth System Science: Challenges and Perspectives, *Rev. Geophys.*, 55, 1199–  
46 1256, <https://doi.org/10.1002/2017RG000581>, 2017  
47  
48 Luo, Y., Ahlström, A., Allison, S. D., Batjes, N. H., Brovkin, V., Carvalhais, N., Chappell, A.,  
49 Ciais, P., Davidson, E. A., Finzi, A., Georgiou, K., Guenet, B., Hararuk, O., Harden, J. W., He,  
50 Y., Hopkins, F., Jiang, L., Koven, C., Jackson, R. B., Jones, C. D., Lara, M. J., Liang, J.,  
51 McGuire, A. D., Parton, W., Peng, C., Randerson, J. T., Salazar, A., Sierra, C. A., Smith, M. J.,  
52 Tian, H., Todd-Brown, K. E. O., Torn, M., van Groenigen, K. J., Wang, Y. P., West, T. O., Wei,  
53 Y., Wieder, W. R., Xia, J., Xu, X., Xu, X., and Zhou, T. C. G. B.: Toward more realistic  
54 projections of soil carbon dynamics by Earth system models, *Global Biogeochem. Cy.*, 30, 40–  
55 56, <https://doi.org/10.1002/2015gb005239>, 2016  
56  
57 Mahrt, L., and K. Ek: The influence of atmospheric stability on potential evaporation. *J. Climate*  
58 *Appl. Meteor.*, 23 , 222–234, 1984  
59





- 1 Met Eireann Report: *A summer of heatwaves and droughts*. Available  
2 at: <https://www.met.ie/cms/assets/uploads/2018/09/summerfinal3.pdf> [Accessed November  
3 2019], 2018  
4
- 5 Moore, P.: *Summer 2018*. Available  
6 at: <https://www.met.ie/cms/assets/uploads/2020/06/Summer2018.pdf> [Accessed February  
7 2021], 2020  
8
- 9 Murphy, R. M., Saunders, M., Richards, K. G., Krol, D. J., Gebremichael, A. W., Rambaud, J.,  
10 Cowan, N., Lanigan, G. J.: Nitrous oxide emission factors from an intensively grazed temperate  
11 grassland: A comparison of cumulative emissions determined by eddy covariance and static  
12 chamber methods, *Agric. Ecosys. Environ.*, 324, 107725,  
13 <https://doi.org/10.1016/j.agee.2021.107725>, 2022  
14
- 15 Muñoz Sabater, J., Dutra, E., Agustí-Panareda, A., Albergel, C., Arduini, G., Balsamo, G.,  
16 Boussetta, S., Choulga, M., Harrigan, S., Hersbach, H., Martens, B., Miralles, D. G., Piles, M.,  
17 Rodríguez-Fernández, N. J., Zsoter, E., Buontempo, C., Thepaut, J.-N.: ERA5-Land: a state-of-  
18 the-art global reanalysis dataset for land applications, *Earth Sys. Sci. Data*, 13, 4349 - 4383,  
19 <https://doi.org/10.5194/essd-13-4349-2021>, 2021  
20
- 21 Nie, W., Kumar, S. V., Arsenault, K. R., Peters-Lidard, C. D., Mladenova, I. E., Bergaoui, K.,  
22 Hazra, A., Zaitchik, B. F., Mahanama, S. P., McDonnell, R., Mocko, D. M., and Navari, M.:  
23 Towards effective drought monitoring in the Middle East and North Africa (MENA) region:  
24 implications from assimilating leaf area index and soil moisture into the Noah-MP land surface  
25 model for Morocco, *Hydrol. Earth Syst. Sci.*, 26, 2365–2386, [https://doi.org/10.5194/hess-26-](https://doi.org/10.5194/hess-26-2365-2022)  
26 [2365-2022](https://doi.org/10.5194/hess-26-2365-2022), 2022  
27
- 28 Niu, G.-Y., Yang, Z.-L., Dickinson, R. E., Gulden, L. E., & Su, H.: Development of a simple  
29 groundwater model for use in climate models and evaluation with Gravity Recovery and Climate  
30 Experiment data. *Journal of Geophysical Research*, 112(D7), D07103. <https://doi.org/10.1029/2006JD007522>, 2007  
31  
32
- 33 Niu, G.-Y., Yang, Z.-L., Mitchell, K. E., Chen, F., Ek, M. B., Barlage, M., Kumar, A., Manning,  
34 K., Niyogi, D., Rosero, E., Tewari, M., and Xia, Y.: The community Noah land surface model  
35 with multiparameterization options (Noah-MP): 1. Model description and evaluation with local-  
36 scale measurements, *J. Geophys. Res.-Atmos.*, 116,  
37 D12110, <https://doi.org/10.1029/2010JD015139>, 2011  
38
- 39 Noone, S., Broderick, C., Duffy, C., Matthews, T., Wilby, R.L. and Murphy, C.: A 250-year  
40 drought catalogue for the Island of Ireland (1765–2015). *International Journal of*  
41 *Climatology*, 37(S1), 239–254, 2017  
42
- 43 Or, D., and P. Lehmann: Surface evaporative capacitance: How soil type and rainfall  
44 characteristics affect global-scale surface evaporation. *Water Resour. Res.*, 55, 519–  
45 539, <https://doi.org/10.1029/2018WR024050>, 2019  
46
- 47 Paulik, C., Dorigo, W., Wagner, W., and Kidd, R.: Validation of the ASCAT Soil Water Index  
48 using in situ data from the International Soil Moisture Network, *Int. J. Appl. Earth Obs.*, 30, 1–  
49 8, <https://doi.org/10.1016/j.jag.2014.01.007>, 2014  
50
- 51 Peel, M.C., Finlayson, B.L. and McMahon, T.A.: Updated world map of the Köppen–Geiger  
52 climate classification. *Hydrology and Earth System Sciences*, 11, 1633–1644, 2007  
53
- 54 Poggio, L., de Sousa, L. M., Batjes, N. H., Heuvelink, G. B. M., Kempen, B., Ribeiro, E., and  
55 Rossiter, D.: SoilGrids 2.0: producing soil information for the globe with quantified spatial  
56 uncertainty, *SOIL*, 7, 217–240, 2021.  
57
- 58 Sakaguchi, K., Zeng, X.: Effects of soil wetness, plant litter, and under-canopy atmospheric  
59 stability on ground evaporation in the Community Land Model (CLM3.5), *J. Geophys. Res.*, 114,  
60 D01107, doi:10.1029/2008JD010834, 2009





- 1  
2 Samaniego, L., S. Thober, R. Kumar, Wanders, N., Rakovec, O., Pan, M., Zink, M., Sheffield,  
3 J., Wood, E. F., Marx, A: Anthropogenic warming exacerbates European soil moisture droughts  
4 *Nat. Clim. Chang.*, 8, 421-426, 10.1038/s41558-018-0138-5, 2018  
5  
6 Saxton, K. E., & Rawls, W. J.: Soil water characteristic estimates by texture and organic matter  
7 for hydrologic solutions. *Soil Science Society of America*  
8 *Journal*, **70**(5), 1569– 1578. <https://doi.org/10.2136/sssaj2005.0117>, 2006  
9  
10 Seneviratne, S.I., Corti, T., Davin, E.L., Hirschi, M., Jaeger, E.B., Lehner, I., Orlowsky,  
11 B. and Teuling, A.J.: Investigating soil moisture–climate interactions in a changing climate: a  
12 review. *Earth Science Reviews*, 99, 125–161, 2010.  
13  
14 Seneviratne, S.I. et al.: 'Changes in climate extremes and their impacts on the natural physical  
15 environment'. In: *Managing the Risks of Extreme Events and Disasters to Advance Climate*  
16 *Change Adaptation* [Field, C.B. et al. (eds.)]. Cambridge University Press, Cambridge, UK, and  
17 New York, NY, USA, 109-230, 2012 .  
18  
19 Shangquan, W., Y. Dai, Q. Duan, B. Liu, and H. Yuan, : A global soil data set for earth system  
20 modeling. *J. Adv. Model. Earth Syst.*, **6**, 249–263, <https://doi.org/10.1002/2013MS000293>,  
21 [2014](https://doi.org/10.1002/2013MS000293)  
22  
23 Skamarock, W. C., Klemp, J. B., Dudhia, J., Gill, D. O., Barker, D., Duda, M. G., ... Powers, J.  
24 G.: *A Description of the Advanced Research WRF Version 3* (No. NCAR/TN-475+STR).  
25 University Corporation for Atmospheric Research, <https://doi.org/10.5065/D68S4MVH>, 2008  
26  
27 Svoboda, M., LeComte, D., Hayes, M., Heim, R., Gleason, K., Angel, J., Rippey, B., Tinker,  
28 R., Palecki, M., Stooksbury, D., Miskus, D., Stephens, S.: The Drought Monitor, *Bull. Amer.*  
29 *Meteor. Soc.*, 83, 1181 - 1190, <https://doi.org/10.1175/1520-0477-83.8.1181>, 2002  
30  
31 Szabó, B., G. Szatmári, K. Takács, A. Laborczy, A. Makó, K. Rajkai,  
32 and L. Pásztor, 2019. Mapping soil hydraulic properties using random-forest-based  
33 pedotransfer functions and geostatistics. *Hydrol. Earth Syst. Sci.*, **23**, 2615–  
34 2635, <https://doi.org/10.5194/hess-23-2615-2019>, 2019  
35  
36 Vereecken, H., Weynants, M., Javaux, M., Pachepsky, Y., Schaap, M. G., & van Genuchten,  
37 M. T.: Using pedotransfer functions to estimate the Van Genuchten-Mualem soil hydraulic  
38 properties—A review. *Vadose Zone*  
39 *Journal*, **9**, 795– 820. <https://doi.org/10.2136/vzj2010.0045>, 2010  
40  
41 Wagner, W., Lemoine, G., and Rott, H.: A method for estimating soil moisture from ERS  
42 scatterometer and soil data, *Remote Sens. Environ.*, 70, 191–207, 1999.  
43  
44 Walsh S.: A summary of climate averages for Ireland, 1981 – 2010. MET Eireann  
45 CLIMATOLOGICAL NOTE No. 14, Dublin. [https://www.met.ie/climate-](https://www.met.ie/climate-ireland/SummaryClimAvgs.pdf)  
46 [ireland/SummaryClimAvgs.pdf](https://www.met.ie/climate-ireland/SummaryClimAvgs.pdf) , last accessed Oct., 2023, 2012  
47  
48 Warrach-Sagi, K., Ingwersen, J., Schwitalla, T., Troost, C., Aurbacher, J., Jach, L., et al.: Noah-  
49 MP with the generic crop growth model Gecros in the WRF model: Effects of dynamic crop  
50 growth on land-atmosphere interaction. *Journal of Geophysical Research: Atmospheres*, 127,  
51 e2022JD036518. <https://doi.org/10.1029/2022JD036518>, 2022  
52  
53 Weihermüller, L., P. Lehmann, M. Herbst, M. Rahmati, A. Verhoef, D. Or, D. Jacques,  
54 and H. Vereecken: Choice of pedotransfer functions matters when simulating soil water  
55 balance fluxes. *J. Adv. Model. Earth*  
56 *Syst.*, **13**, e2020MS002404M, <https://doi.org/10.1029/2020MS002404>, 2021  
57  
58 Xia, Y., Ek, M. B., Peters-Lidard, C. D., Mocko, D., Svoboda, M., Sheffield, J., Wood, E. F.:  
59 Application of USDM statistics in NLDAS-2: Optimal blended NLDAS drought index over the



1 continental United States, *JGR-Atmospheres*, 119, 2947-2965,  
2 <https://doi.org/10.1002/2013JD020994>, 2014  
3  
4 Xu, C., Torres-Rojas, L., Vergopalan, N., Chaney, N. W.: The benefits of using state-of-the-art  
5 digital soil properties maps to improve the modeling of soil moisture in land surface models,  
6 *Water Resour. Res.*, 59, e2022WR032336, <https://doi.org/10.1029/2022WR032336>, 2023  
7  
8 Zhang, Y., M. G. Schaap, and Y. Zha: A high-resolution global map of soil hydraulic properties  
9 produced by a hierarchical parameterization of a physically based water retention model. *Water*  
10 *Resour. Res.*, 54, 9774–9790, <https://doi.org/10.1029/2018WR023539>, 2018  
11  
12 Zhang, Z., Laux, P., Baade, J., Arnault, J., Wei, J., wang, X., Liu, Y., Schmulius, C., Kuntsmann,  
13 H: Impact of alternative soil data sources on the uncertainties in simulated land-atmosphere  
14 interactions, *Agric. Fores. Meteor.*, 339, 109565,  
15 <https://doi.org/10.1016/j.agrformet.2023.109565>, 2023  
16  
17 Zhuo, L., Dai, Q., Han, D., Chen, N., Zhao, B.: Assessment of simulated soil moisture from  
18 WRF Noah, Noah-MP, and CLM land surface schemes for landslides hazard application,  
19 *Hydrol. Earth Sys Sci.*, 23, 4199-4218, <https://doi.org/10.5194/hess-23-4199-2019>, 2019  
20  
21  
22  
23  
24  
25  
26  
27  
28  
29  
30  
31  
32  
33  
34  
35  
36  
37  
38  
39  
40  
41  
42  
43  
44  
45  
46



1 Table 1. Summary of locations of in situ measurements. The station land cover and elevation data are  
 2 obtained from Met Eireann service. The station soil texture data for Johnstown Castle and Dripsey are  
 3 obtained from previous work (Kiely et al., 2018; Murphy et al., 2022), and soil texture map from the  
 4 Irish Soil Information System (Creamer et al., 2014) are used for the in situ Terrain-AI sites

| 5 Sites                | 6 Lon/Lat<br>(°)          | 7 Elevation<br>(m) | 8 Field<br>Capacity | 9 Soil texture category |                   |              |
|------------------------|---------------------------|--------------------|---------------------|-------------------------|-------------------|--------------|
|                        |                           |                    |                     | 10 In-situ              | 11 STATSGO        | 12 SOILGRIDS |
| 13 Athenry             | 14 -8.786/<br>15 53.2892  | 16 40.0            | 17 -                | 18 Loam                 | 19 Loam           | 20 Loam      |
| 21 Ballyhaise          | 22 -7.309/<br>23 54.0513  | 24 78.0            | 25 -                | 26 Loam                 | 27 Clay-<br>Loam  | 28 Loam      |
| 29 Claremorris         | 30 -8.992/<br>31 53.7108  | 32 68.0            | 33 -                | 34 Sandy-<br>Loam       | 35 Loam           | 36 Loam      |
| 37 Dunsany             | 38 -6.660/<br>39 53.5158  | 40 83.0            | 41 -                | 42 Loam                 | 43 Loam           | 44 Loam      |
| 45 Valentia            | 46 -10.244/<br>47 51.9397 | 48 25.0            | 49 -                | 50 Sandy-<br>Loam       | 51 Sandy-<br>Loam | 52 Loam      |
| 53 Johnstown<br>Castle | 54 -6.505/<br>55 52.2981  | 56 52.0            | 57 0.32             | 58 Sandy-<br>Loam       | 59 Loam           | 60 Loam      |
| 61 Dripsey             | 62 -8.752/<br>63 51.9867  | 64 190.0           | 65 0.42             | 66 Loam                 | 67 Loam           | 68 Loam      |

28 Table 2. Percentage proportion of grids covered by soil texture categories  
 29 for STATSGO and SOILGRIDS databases used.

| 30 Soil texture    | 31 STATSGO<br>(%) | 32 SOILGRIDS<br>(%) |
|--------------------|-------------------|---------------------|
| 33 Sandy Loam      | 34 16.4           | 35 27.0             |
| 36 Loam            | 37 57.8           | 38 71.5             |
| 39 Sandy Clay Loam | 40 0              | 41 1.4              |
| 42 Clay Loam       | 43 19.5           | 44 0.1              |
| 45 Clay            | 46 6.3            | 47 0                |

37  
38  
39  
40  
41  
42  
43  
44  
45  
46



1 Table 3. Summary of NOAA-MP physical options used in this study

| 2 Physical processes          | Options                                  |
|-------------------------------|------------------------------------------|
| 3 Vegetation                  | (4) Prescribed LAI + Prescribed max FVEG |
| 4 Canopy stomatal resistance  | (1) Ball-berry                           |
| 5                             | (2) Jarvis                               |
| 6 Soil moisture factor        | (1) Noah                                 |
| 7 Runoff and groundwater      | (3) Noah (free drainage)                 |
| 8 Surface layer drag          | (1) Monin-Obukhov                        |
| 9 Radiation transfer          | (3) Gap=1-FVEG                           |
| 10 Snow surface albedo        | (2) CLASS                                |
| 11 Precipitation partition    | (1) Jordan (1991)                        |
| 12 Lower boundary soil        |                                          |
| 13 temperature                | (2) Soil temperature at 8m depth         |
| 14 Snow/soil temperature time | (1) Semi-implicit                        |
| 15 Surface resistance         | (1) Sakaguchi and Zeng (2009)            |
| 16 Soil data                  | (1) Dominant soil texture                |
| 17                            | (3) Soil composition and PedoTransfers   |
| 18 PedoTransfers              | (1) Saxton and Rawls (2006)              |

19  
 20  
 21

22 Table 4. Definitions of drought categories based on Relative Soil Moisture (RSM) percentiles

| 23 ID             | RSM percentile | Descriptions |
|-------------------|----------------|--------------|
| 24 <b>Dryness</b> |                |              |
| 25 D0             | ≤ 30           | Abnormal     |
| 26 D1             | ≤ 20           | Moderate     |
| 27 D2             | ≤ 10           | Severe       |
| 28 D3             | ≤ 5            | Extreme      |
| 29 D4             | ≤ 2            | Exceptional  |
| 30 <b>Wetness</b> |                |              |
| 31 W0             | ≥ 70           | Abnormal     |
| 32 W1             | ≥ 80           | Moderate     |
| 33 W2             | ≥ 90           | Severe       |
| 34 W3             | ≥ 95           | Extreme      |
| 35 W4             | ≥ 98           | Exceptional  |

36  
 37



1 Table 5. Performance statistics of Relative Soil Moisture (RSM) for various soil texture categories at  
 2 the topsoil (0 – 10 cm) and subsurface (0 – 100 cm) in STATSGO and SOILGRIDS for 2018 year. The  
 3 errors are the median grid values. SL- Sandy Loam, L – Loam, SCL – Sandy Clay Loam, CL – Clay Loam,  
 4 C – Clay.

| 5 Soil<br>6 texture  | RMSD    |           | PBIAS   |           | R       |           |  |
|----------------------|---------|-----------|---------|-----------|---------|-----------|--|
|                      | STATSGO | SOILGRIDS | STATSGO | SOILGRIDS | STATSGO | SOILGRIDS |  |
| 7 <b>Surface</b>     |         |           |         |           |         |           |  |
| 8 SL                 | 0.016   | 0.016     | -3.0    | 5.3       | 0.82    | 0.80      |  |
| 9 L                  | 0.018   | 0.018     | -7.8    | -4.5      | 0.84    | 0.84      |  |
| 10 SCL               | -       | 0.017     | -       | -6.0      | -       | 0.84      |  |
| 11 CL                | 0.016   | 0.016     | 11.0    | 4.6       | 0.79    | 0.86      |  |
| 12 C                 | 0.017   | -         | 9.7     | -         | 0.82    | -         |  |
| 13 <b>Subsurface</b> |         |           |         |           |         |           |  |
| 14 SL                | 0.016   | 0.015     | 2.9     | 3.6       | 0.56    | 0.61      |  |
| 15 L                 | 0.016   | 0.015     | -1.9    | -0.5      | 0.57    | 0.59      |  |
| 16 SCL               | -       | 0.015     | -       | 2.0       | -       | 0.62      |  |
| 17 CL                | 0.014   | 0.015     | 4.5     | -3.3      | 0.62    | 0.58      |  |
| 18 C                 | 0.014   | -         | -1.3    | -         | 0.61    | -         |  |

19  
 20

21 Table 6. Performance statistics of Relative Soil Moisture (RSM) for various soil texture categories at  
 22 the topsoil (0 – 10 cm) and subsurface (0 – 100 cm) in STATSGO and SOILGRIDS for 2019 year. The  
 23 errors are the median grid values. SL- Sandy Loam, L – Loam, SCL – Sandy Clay Loam, CL – Clay Loam, C  
 24 – Clay.

| 25 Soil<br>26 texture | RMSD    |           | PBIAS   |           | R       |           |  |
|-----------------------|---------|-----------|---------|-----------|---------|-----------|--|
|                       | STATSGO | SOILGRIDS | STATSGO | SOILGRIDS | STATSGO | SOILGRIDS |  |
| 27 <b>Surface</b>     |         |           |         |           |         |           |  |
| 28 SL                 | 0.015   | 0.016     | 3.6     | 9.8       | 0.68    | 0.66      |  |
| 29 L                  | 0.016   | 0.016     | 1.2     | 5.2       | 0.72    | 0.71      |  |
| 30 SCL                | -       | 0.016     | -       | 4.8       | -       | 0.67      |  |
| 31 CL                 | 0.019   | 0.018     | 21.2    | 18.0      | 0.61    | 0.81      |  |
| 32 C                  | 0.019   | -         | 20.1    | -         | 0.79    | -         |  |
| 33 <b>Subsurface</b>  |         |           |         |           |         |           |  |
| 34 SL                 | 0.013   | 0.012     | 17.8    | 16.7      | 0.61    | 0.63      |  |
| 35 L                  | 0.011   | 0.012     | 13.8    | 16.4      | 0.68    | 0.71      |  |
| 36 SCL                | -       | 0.013     | -       | 19.1      | -       | 0.73      |  |
| 37 CL                 | 0.013   | 0.011     | 20.5    | 16.1      | 0.73    | 0.76      |  |
| 38 C                  | 0.012   | -         | 16.1    | -         | 0.77    | -         |  |



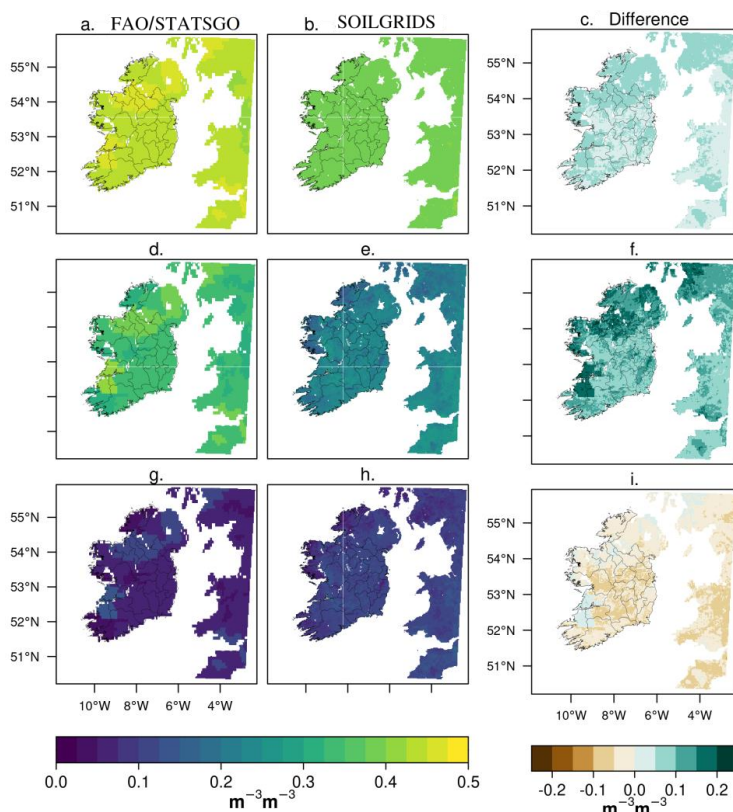

1  
2 Figure 3. Spatial characteristics of absolute and difference between STATSGO and  
3 SOILGRIDS for [a-c] soil porosity, [d-f] field capacity and [g-i] wilting point.



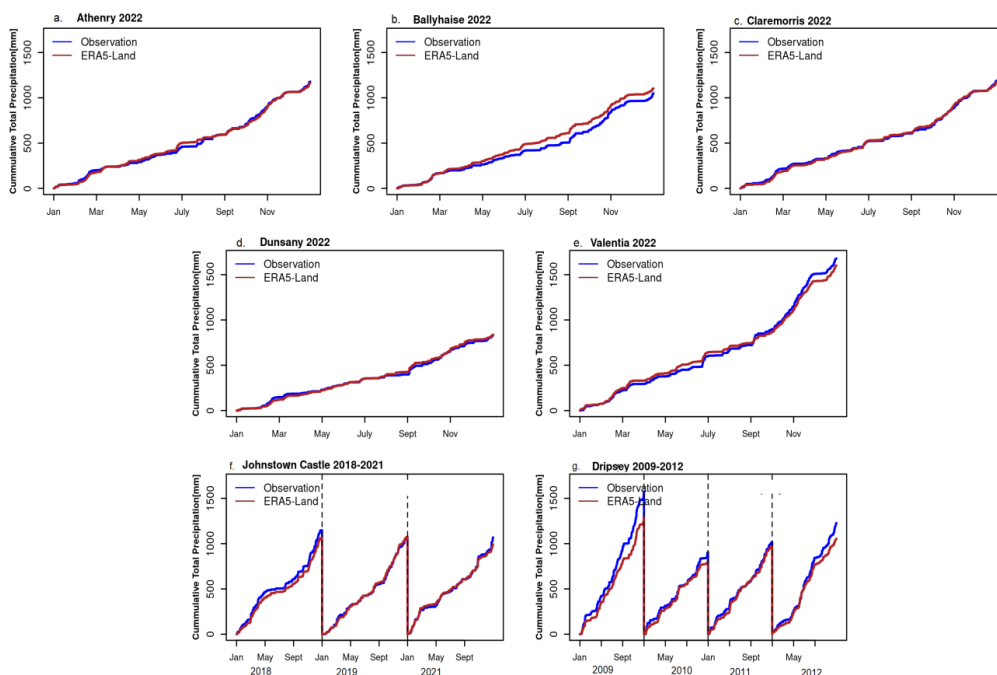

1  
2 Figure 4. Temporal comparisons of observed total annual cumulative precipitation at the  
3 selected reference stations, against the ERA5-Land collocated grids.  
4  
5

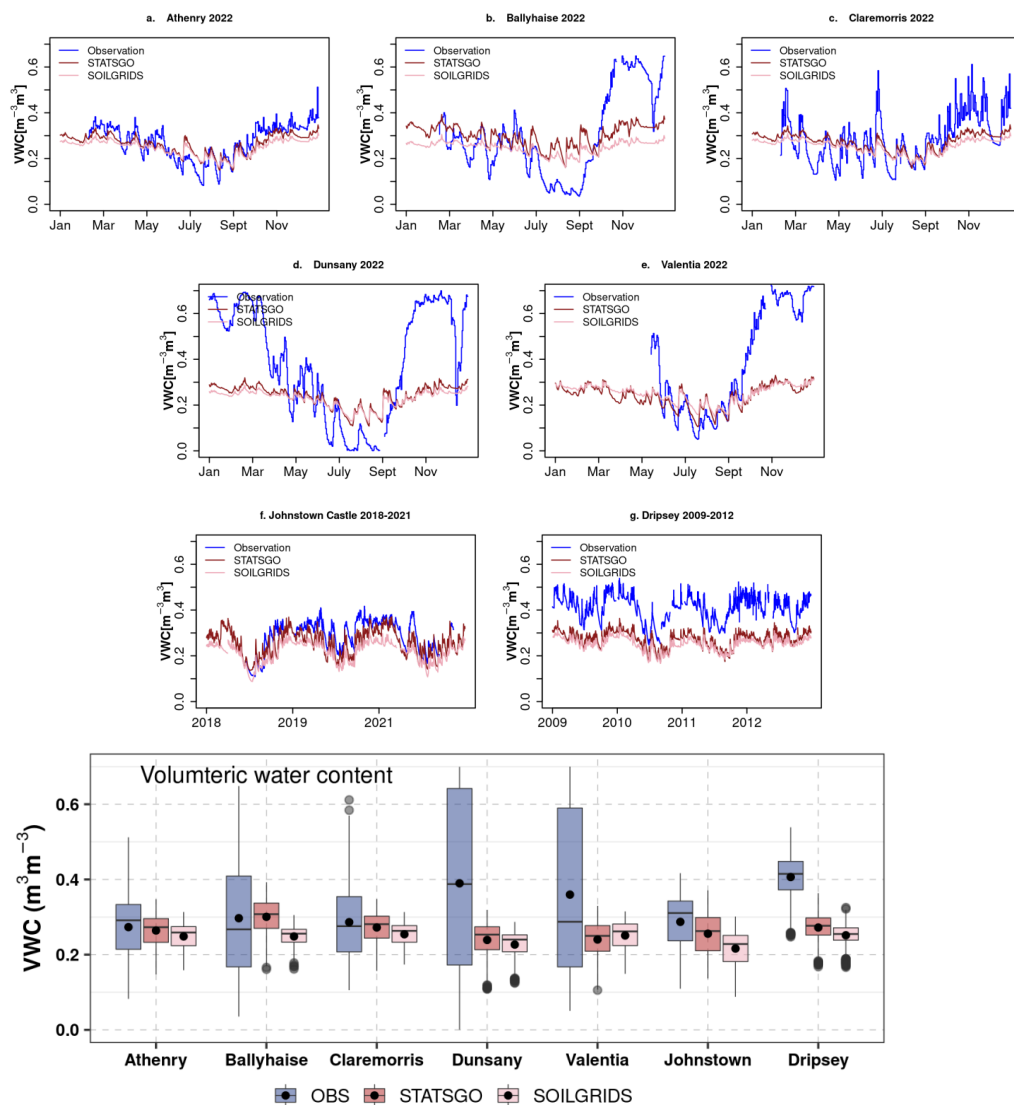

1

2

3 Figure 5. [a-g] Temporal comparisons of volumetric water contents and boxplots of data  
 4 distribution, between observations and simulated values for the selected reference stations.  
 5 The black dots in the boxes represent the mean values

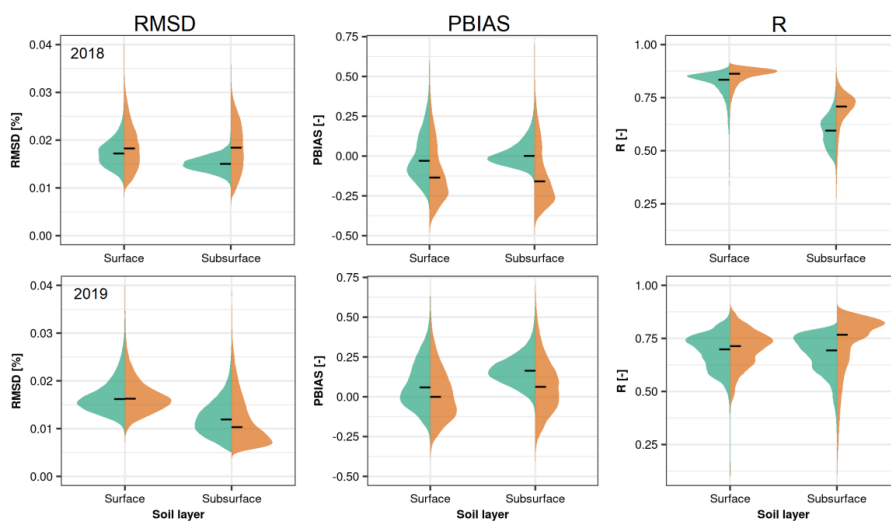

1  
 2  
 3  
 4  
 5  
 6  
 7  
 8  
 Figure 6. Performance statistics for STATSGO and SOILGRIDS derived Relative Soil Moisture (RSM) values at the topsoil layer (0-7 cm) and subsurface soil layer (0-100 cm), against satellite-based ASCAT Soil Water Index (SWI), for 2018 (top) and 2019 (bottom) years. N = 131,000 cells and the black crossbars are the median values.

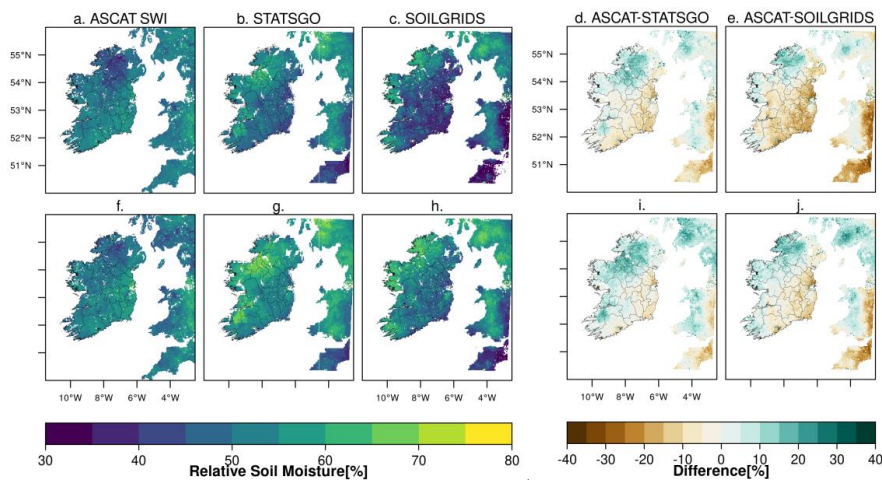

9  
 10  
 11  
 12  
 13  
 14  
 15  
 16  
 17  
 Figure 7. Spatial characteristics of absolute and difference between satellite-based annual ASCAT Soil Water Index (SWI) and model derived annual mean Relative Soil Moisture (RSM) at the surface, for [a-e] 2018 and [f-j] 2019 years

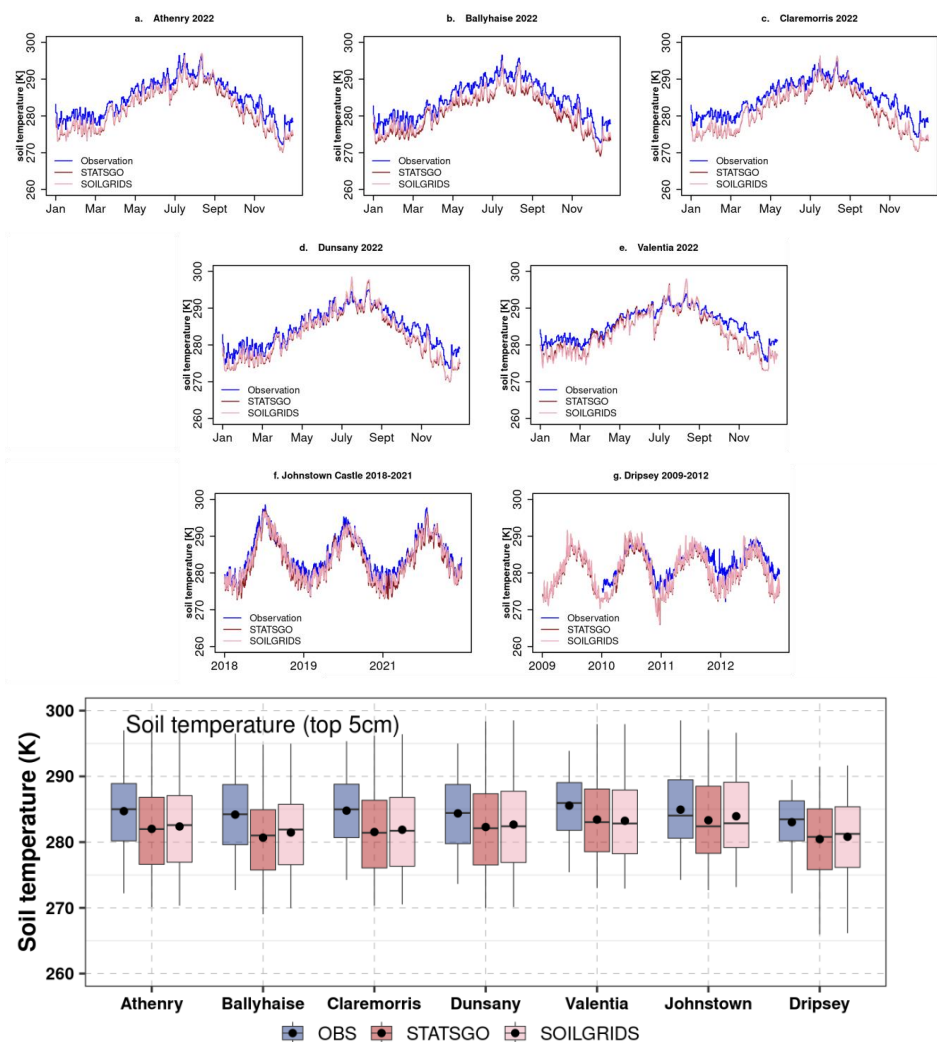

1

2  
3 Figure 8. [a-g] Temporal comparisons of soil temperature and boxplots of data distribution,  
4 between observations and simulated values for the selected reference stations. The black dots  
5 in the boxes represent the mean values

6  
7  
8  
9

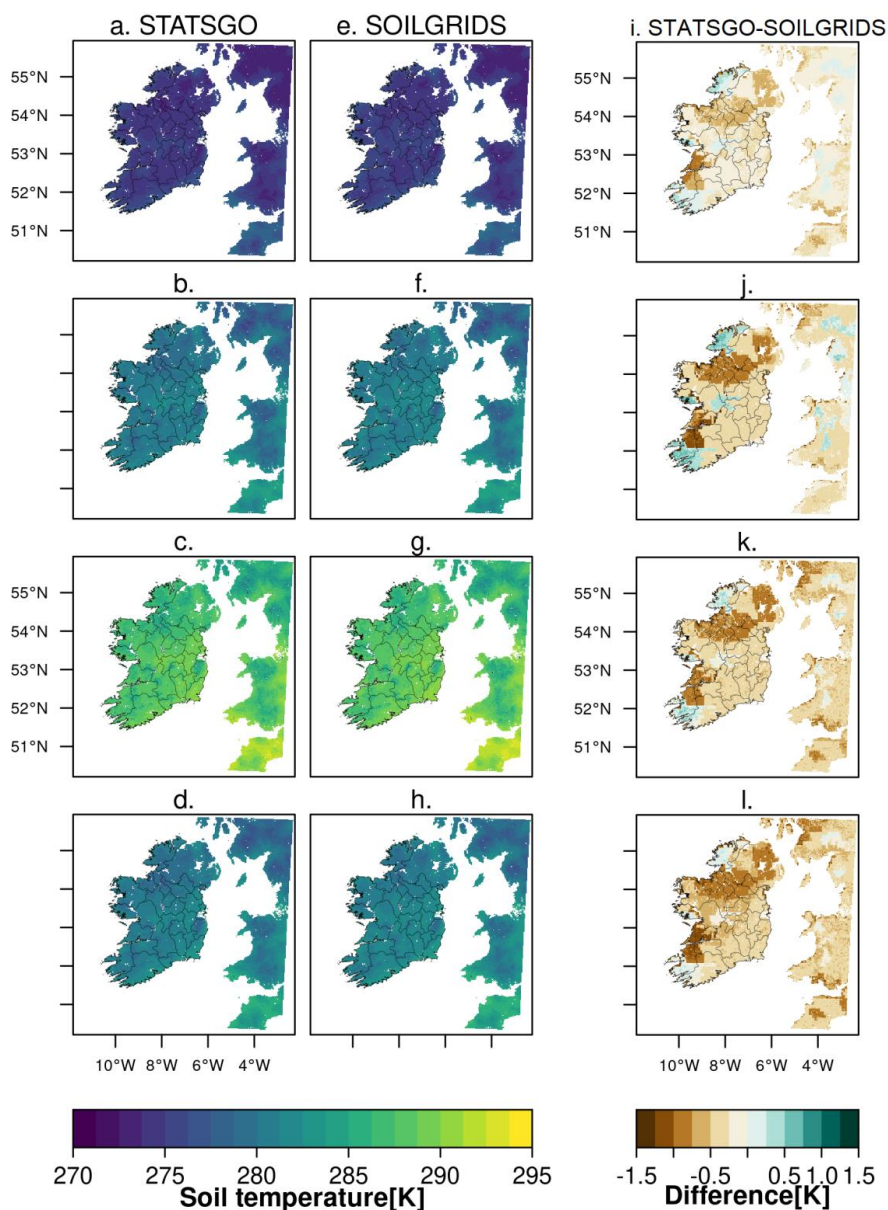

1  
 2 Figure 9. Spatial and seasonal characteristics of simulated top (0-7 cm) soil temperature using  
 3 STATSGO [a-d], SOILGRIDS [e-h] and the difference [i-l], for the period 2009 - 2022. Rows [1-  
 4 4] represent the Winter to Autumn seasons in that order.  
 5  
 6

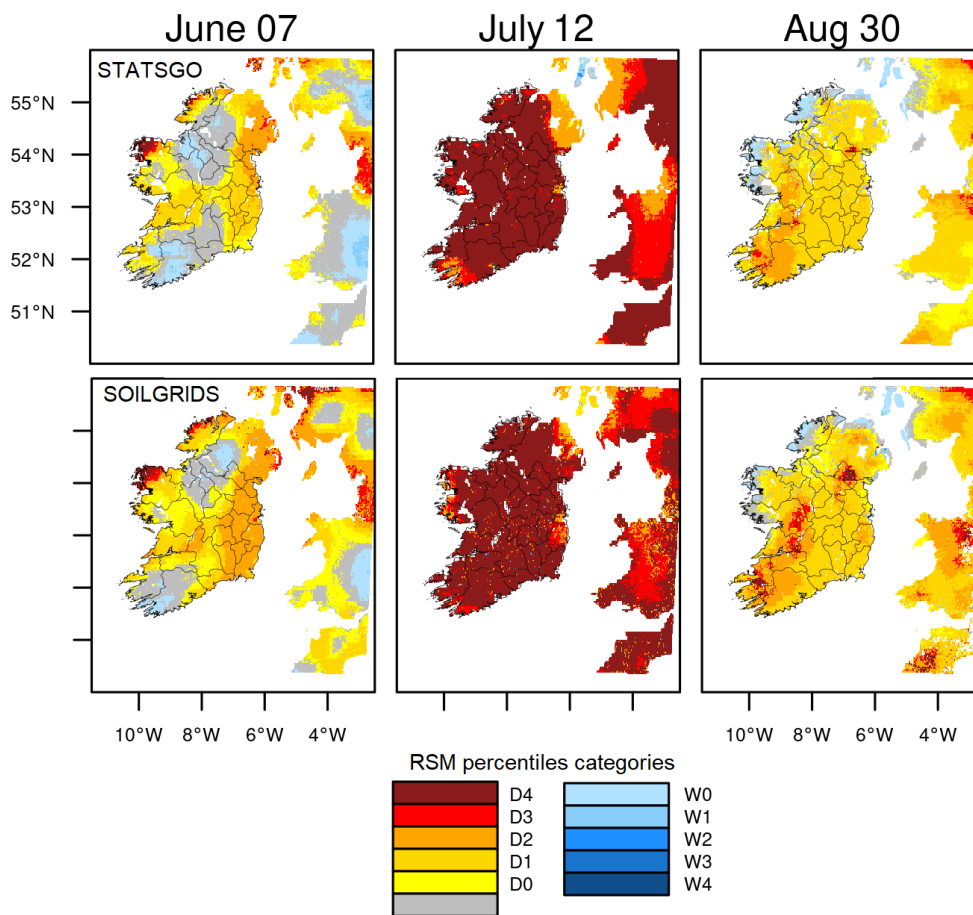

1  
 2  
 3 Figure 10. Spatial characteristics of soil moisture drought categories derived using 0 – 100 cm  
 4 Relative Soil Moisture percentiles for STATSGO [top] and SOILGRIDS [bottom] for 2018  
 5 summer. D0-D4 represents abnormally dry, moderate, severe, extreme and exceptional  
 6 droughts, while W0-W4 is the corresponding wetness categories.  
 7  
 8  
 9  
 10  
 11  
 12

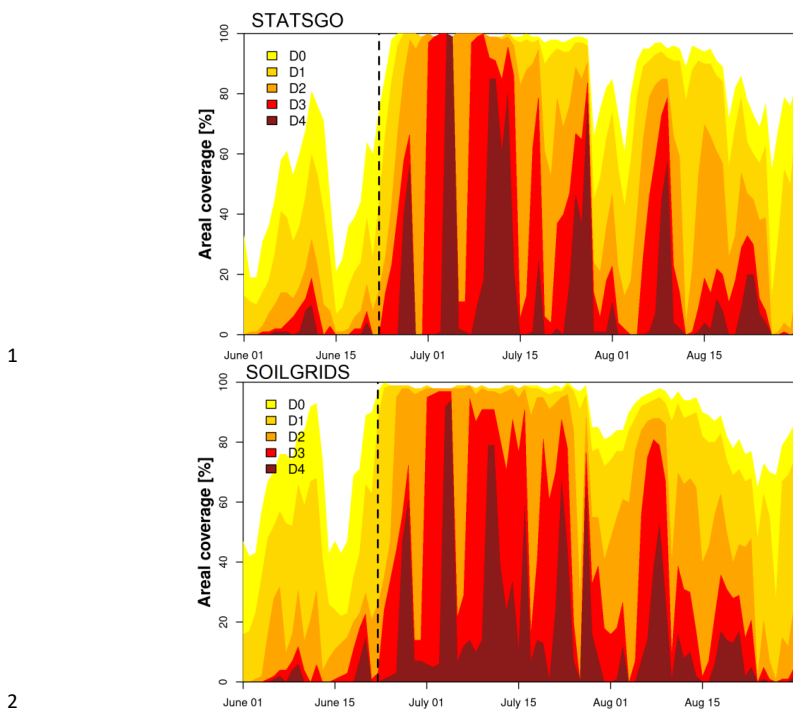

1

2

3

4 Figure 11. Time-areal coverage cross-section of drought evolution based on daily 0 – 100 cm  
 5 Relative Soil Moisture (RSM) percentiles during 2018 summer for STATSGO [top] and  
 6 SOILGRIDS [bottom]. D0-D4 represents abnormally dry, moderate, severe, extreme and  
 7 exceptional droughts. The dashed vertical lines represent the effective start of severe to  
 8 exceptional droughts.

9

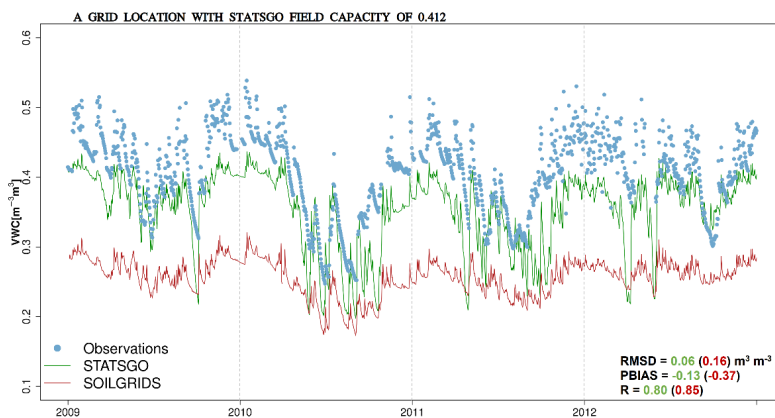

10

11 Figure 12. Temporal comparisons of observed volumetric water content (VWC) at Dripsey  
 12 site, against the simulated values for a nearby grid location with field capacity of  $0.412 \text{ m}^3 \text{ m}^{-3}$ .

13

14 Appendix



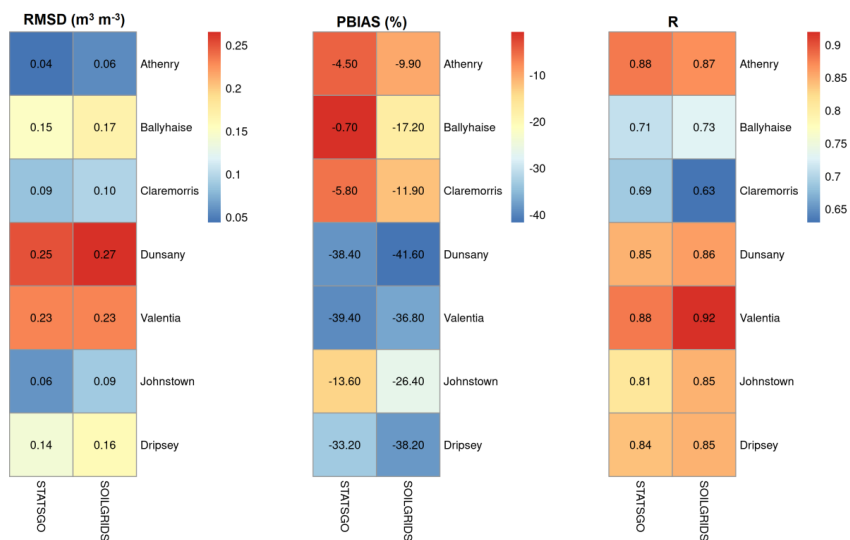

1  
 2 Figure A1. Error statistics of volumetric water contents between observations and model  
 3 experiments for the selected reference stations.

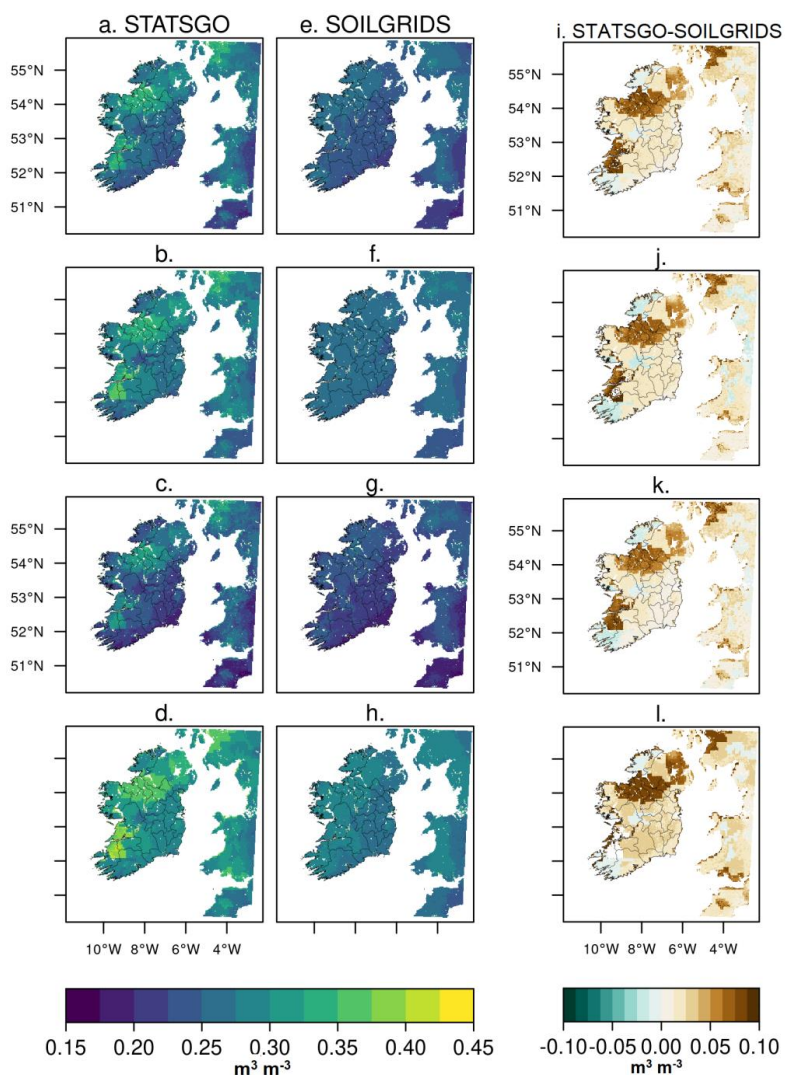

1  
 2 Figure A2. Spatial and seasonal characteristics of simulated top soil (0-7 cm) volumetric water  
 3 content (VWC) using STATSGO [a-d], SOILGRIDS [e-h] and the difference [i-l], for the period  
 4 2009 - 2022. Rows [1-4] represent the Winter to Autumn seasons in that order  
 5

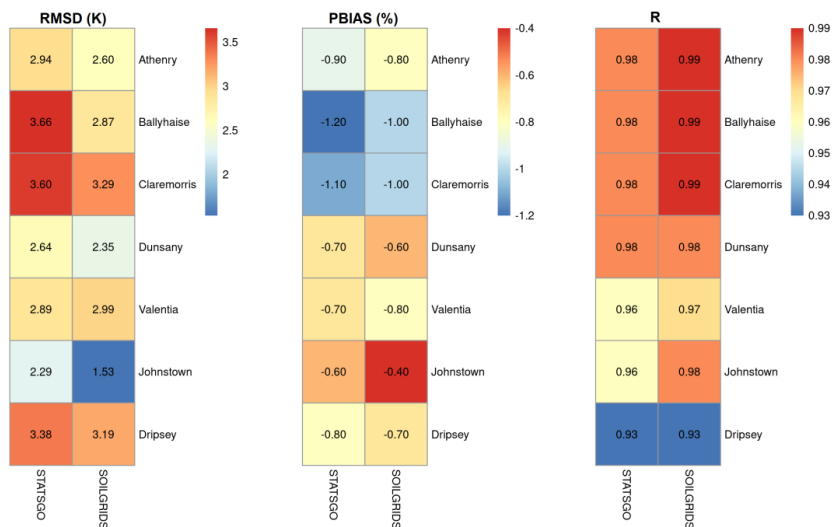

1  
 2 Figure A3. Error statistics of soil temperature between observations and model experiments  
 3 for the selected reference stations.  
 4  
 5
